# Supplementary material for: Initiating photocatalytic degradation of organic pollutants under ultra-low light intensity via oxygen-centered organic radicals
Source: Royal Society of Chemistry journal article supplement (doi:10.1039/d4sc06339b), 2025-01-01
Supplement: d4sc06339b1.pdf [file d4sc06339b1.pdf]

1 **Initiating Photocatalytic Degradation of Organic Pollutants under**  
2 **Ultra-Low Light Intensity via Oxygen-Centered Organic Radicals**

3 Yingge He<sup>a</sup>, Yuyan Huang<sup>b</sup>, Yu-Xin Ye<sup>c,d\*</sup>, Yanchun Deng<sup>a</sup>, Xin Yang<sup>a\*</sup>, Gangfeng Ouyang<sup>b,c,d\*</sup>

4 <sup>a</sup>School of Environmental Science and Engineering, Guangdong Provincial Key Laboratory of  
5 Environmental Pollution Control and Remediation Technology, Sun Yat-sen University,  
6 Guangzhou, China.

7 <sup>b</sup>Key Laboratory of Bioinorganic and Synthetic Chemistry of Ministry of Education, LIFM,  
8 School of Chemistry, IGCME, Sun Yat-Sen University, Guangzhou, China.

9 <sup>c</sup>School of Chemical Engineering and Technology, IGCME, Sun Yat-sen University, Zhuhai,  
10 China.

11 <sup>d</sup>Southern Marine Science and Engineering Guangdong Laboratory (Zhuhai), Zhuhai, China.

12 \*Correspondence to: [yeyuxin5@sysu.edu.cn](mailto:yeyuxin5@sysu.edu.cn); [yangx36@mail.sysu.edu.cn](mailto:yangx36@mail.sysu.edu.cn); [cesoygf@mail.sysu.edu.cn](mailto:cesoygf@mail.sysu.edu.cn)  
13 [du.cn](http://du.cn)

14

15

## Table of contents

|    |                                                                                   |    |
|----|-----------------------------------------------------------------------------------|----|
| 16 | <b>Supplemental Methods</b> .....                                                 | 4  |
| 17 | Materials .....                                                                   | 4  |
| 18 | Synthesis of TPE-AQ-molecule .....                                                | 5  |
| 19 | Characterization .....                                                            | 5  |
| 20 | Photocatalytic Experiments .....                                                  | 6  |
| 21 | Electrochemical measurements .....                                                | 7  |
| 22 | EPR Analysis .....                                                                | 8  |
| 23 | Recycling Experiments .....                                                       | 10 |
| 24 | Determination of H <sub>2</sub> O <sub>2</sub> concentration .....                | 10 |
| 25 | Evaluation of KIE (Kinetic Isotope Effect) .....                                  | 11 |
| 26 | Analytical methods .....                                                          | 11 |
| 27 | <b>Supplemental Notes</b> .....                                                   | 13 |
| 28 | Supplemental Note 1. Charge carriers separation and transfer performance of CPs   |    |
| 29 | .....                                                                             | 13 |
| 30 | Supplemental Note 2. Attribution of signals in transient absorption spectra ..... | 13 |
| 31 | <b>Supplemental Figures</b> .....                                                 | 15 |
| 32 | Figure S1. PXRD patterns of TPE-AQ and TPE-FN. ....                               | 15 |
| 33 | Figure S2. Scanning electron microscope (SEM) images of CPs. ....                 | 16 |
| 34 | Figure S3. FT-IR spectra of TPE-AQ, TPE-FN, and monomer. ....                     | 17 |
| 35 | Figure S4. The XPS spectra of TPE-AQ and TPE-FN. ....                             | 18 |
| 36 | Figure S5. Solid state <sup>13</sup> C CP-MAS NMR spectra. ....                   | 19 |
| 37 | Figure S6. Measurements of Brunauer-Emmett-Teller surface areas. ....             | 20 |
| 38 | Figure S7. Characterization of CBM through Mott Schottky. ....                    | 21 |
| 39 | Figure S8. XPS valence band spectrum of CPs. ....                                 | 22 |
| 40 | Figure S9. Characterization of sample work function through Kelvin Probe Force    |    |
| 41 | Microscopy (KPFM). ....                                                           | 23 |
| 42 | Figure S10. Solar irradiance levels under various environmental conditions. ....  | 24 |
| 43 | Figure S11. The experimental device and light source spectrum. ....               | 25 |
| 44 | Figure S12. Reaction condition gradient experiments. ....                         | 26 |

|    |                                                                                        |    |
|----|----------------------------------------------------------------------------------------|----|
| 45 | Figure S13. The photocatalytic performance of CPs for BPA degradation. ....            | 27 |
| 46 | Figure S14. The withstand interference ability test. ....                              | 28 |
| 47 | Figure S15. Recycle experiments of TPE-AQ. ....                                        | 29 |
| 48 | Figure S16. Post-characterization of TPE-AQ after photocatalysis. ....                 | 30 |
| 49 | Figure S17. Degradation of different micropollutants in the TPE-AQ system. ...         | 31 |
| 50 | Figure S18. EPR spectra of TPE-AQ. ....                                                | 32 |
| 51 | Figure S19. Photoluminescence spectra of TPE-AQ, TPE-FN, and                           |    |
| 52 | TPE-AQ-molecule. ....                                                                  | 33 |
| 53 | Figure S20. Photocurrent responses and electrochemical impedance spectroscopy          |    |
| 54 | analysis. ....                                                                         | 34 |
| 55 | Figure S21. Femtosecond transient absorption measurements probed at visible            |    |
| 56 | region. ....                                                                           | 35 |
| 57 | Figure S22. $\Delta$ EPR signal intensity as a function of excitation wavelength. .... | 36 |
| 58 | Figure S23. The lifetime of OCORs. ....                                                | 37 |
| 59 | Figure S24. Femtosecond transient absorption measurements probed at                    |    |
| 60 | near-infrared region. ....                                                             | 38 |
| 61 | Figure S25. The time-dependent in-situ EPR spectra of TPE-AQ in H <sub>2</sub> O. .... | 39 |
| 62 | Figure S26. Characterization of the electron storage properties of TPE-AQ. ....        | 40 |
| 63 | Figure S27. H/D kinetic isotope effect for phenol degradation in TPE-AQ system         |    |
| 64 | .....                                                                                  | 41 |
| 65 | Figure S28. Photocatalytic degradation pathway of BPA. ....                            | 42 |
| 66 | Figure S29. TOC removal in the TPE-AQ system. ....                                     | 43 |
| 67 | Figure S30. Effect of atmospheric on the photocatalytic performance of TPE-AQ.         |    |
| 68 | .....                                                                                  | 44 |
| 69 | <b>Supplemental Tables</b> .....                                                       | 45 |
| 70 | Table S1. Photocatalytic activity and light intensity between TPE-AQ and other         |    |
| 71 | reported photocatalysts for micropollutants degradation. ....                          | 45 |
| 72 | Table S2. The HPLC conditions for analysis of different micropollutants. ....          | 46 |
| 73 | Table S3. Atomic coordinates of the TPE-AQ optimized computational model. .            | 47 |
| 74 | Table S4. Atomic coordinates of the TPE-FN optimized computational model. .            | 49 |

|    |                                                                                  |    |
|----|----------------------------------------------------------------------------------|----|
| 75 | Table S5. Time-dependent density functional theory (TD-DFT) of TPE-AQ and        |    |
| 76 | TPE-FN. ....                                                                     | 51 |
| 77 | Table S6. Water quality parameters of the actual water. ....                     | 52 |
| 78 | Table S7. Summary of the half-life and redox potential of common transient       |    |
| 79 | active species and OCORs. ....                                                   | 53 |
| 80 | Table S8. Single-point energy of each substance. ....                            | 54 |
| 81 | Table S9. Identification of transformation products of BPA in the TPE-AQ system. |    |
| 82 | .....                                                                            | 56 |
| 83 | Table S10. Baseline toxicity data predicted using the ECOSAR program of EPI      |    |
| 84 | Suite 4.0. ....                                                                  | 57 |
| 85 | <b>Supplemental References</b> .....                                             | 59 |
| 86 |                                                                                  |    |
| 87 |                                                                                  |    |

## 88 **Supplemental Methods**

### 89 **Materials**

90 2,6-dibromoanthraquinone (96%) and potassium carbonate ( $K_2CO_3$ , 99%) were purchased from  
91 Bidepharm (Shanghai, China). [ethene-1,1,2,2-tetrayltetrakis(benzene-4,1-diyl)]tetraboronic acid  
92 (>95%) was purchased from Jilin Chinese Academy of Sciences-Yanshen Technology.  
93 [4-(1,2,2-triphenylethenyl)phenyl]boronic acid (97%) was purchased from Shanghai Tensus  
94 Biotech Co., Ltd. Tetrakis(triphenylphosphine)palladium ( $Pd(PPh_3)_4$ , 99%) was obtained from  
95 Energy Chemical. TCI supplied the 2,7-dibromo-9-fluorenone (>98%). Phenol (99.5%),  
96 p-chlorophenol (4-CP, 99.5%), and superoxide dismutase (SOD, 20000 units/mg) were purchased  
97 from Macklin Biochemical Co., Ltd (Shanghai, China). 5,5-dimethyl-1-pyrroline N-oxide (DMPO,  
98 98%), 2,2,6,6-tetramethyl-4-piperidinol (TEMP, 98%), bisphenol A (BPA, 98%), sulfamethoxazole  
99 (SMX, 98%), carbamazepine (CBZ, 99%), aniline (98%), triclosan (TCS, 98%), deferoxamine  
100 mesylate salt (DFO), L-histidine (99%) and N, N-dimethylformamide (DMF, 99.8%) were  
101 purchased from Sigma-Aldrich. Catalase from bovine liver (3000 units/mg) was purchased from  
102 Lounbiotech (Guangzhou, China). Silver nitrate ( $AgNO_3$ ) and ethylenediaminetetraacetic acid  
103 disodium salt (EDTA-2Na) were obtained from the Guangzhou Chemical Reagent Factory.  
104 Tert-butyl alcohol (TBA) was supplied by ANPLE Laboratory Technologies (China). Suwannee  
105 River Natural Organic Matter (SRNOM, 2S101N) was obtained from the International Humic  
106 Substances Society (IHSS). The actual water samples (Beijiang River, Xiaogu River, and Sea  
107 water) were all filtered with 0.45  $\mu m$  filter membrane and kept in the dark at 4 °C until use. The  
108 basic characteristics of the actual water were collected in Table S4. All materials were used as  
109 received without further purification or treatment. Ultrapure water (>18  $M\Omega \cdot cm$ ) was used for all

110 the experiments.

### 111 Synthesis of TPE-AQ-molecule

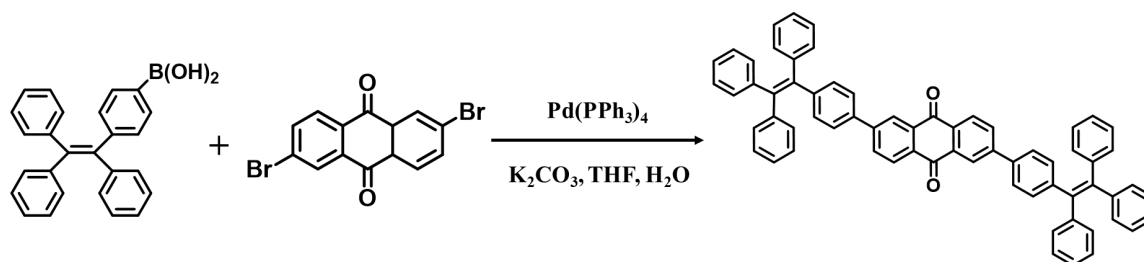

**TPE-AQ-molecule**

112

113 Into a three-necked flask, [4-(1,2,2-triphenylethenyl)phenyl]boronic acid (90.30 mg, 0.24 mmol),

114 2,6-dibromoanthraquinone (36.60 mg, 0.1 mmol), Pd(PPh<sub>3</sub>)<sub>4</sub> (2.68 mg, 0.0023 mmol), K<sub>2</sub>CO<sub>3</sub> (20

115 mg, 0.14 mmol), and a mixed solvent of THF/H<sub>2</sub>O (15 mL/3 mL, respectively) were added. The

116 system was purged with argon gas for 30 minutes. Then, the mixture was heated to 80 °C and

117 stirred overnight. After cooling down to room temperature, water was added, and the mixture was

118 extracted with DCM. The organic phase was collected. Following solvent evaporation, the residue

119 was purified by column chromatography on silica gel (55% yield). <sup>1</sup>H-NMR (400 MHz,

120 Chloroform-d): δ 8.52 ppm (d, J = 1.9 Hz, 2H), 8.37 (d, J = 8.2 Hz, 2H), 8.00 (m, 2H), 7.52 (d, J =

121 8.2 Hz, 4H), 7.21-7.11 (m, 34H).

### 122 Characterization

123 The sample's morphology was examined using a high-resolution field-emission scanning electron

124 microscope (FE-SEM, Hitachi SU8010, Japan) at a 10 kV accelerating voltage. Transmission

125 electron microscope (TEM) observation was carried out using JEOL JEM-ARM200P. The

126 crystalline phases were characterized by a powder X-ray diffraction instrument (D-MAX 2200

127 VPC) and the diffractometer was operated at 40 kV and 26 mA and scanned at 10° min<sup>-1</sup> from 10°

128 to 80°. X-ray photoelectron spectroscopy (XPS) measurements were recorded by using a Thermo

129 Scientific K-Alpha spectrometer with Al K $\alpha$  radiation as the excitation source. Fourier transform  
130 infrared spectra (FT-IR) was recorded on a PerkinElmer Frontier spectrometer. UV-visible  
131 spectroscopy (UV-Vis) was carried out on a Shimadzu UV-3600 spectrometer. <sup>1</sup>H NMR spectra  
132 were recorded on Bruker advance III 400 MHz. The solid-state <sup>13</sup>C NMR spectra were performed  
133 on Bruker Ascend 600 MHz. Electron paramagnetic resonance (EPR) signals were recorded by  
134 Bruker EMXplus. Atomic force microscopy (AFM) measurements were carried out by using the  
135 Bruker dimension icon. Photoluminescence (PL) spectra were recorded on an FLS 1000  
136 spectrometer. N<sub>2</sub> isotherms and surface area measurements were performed on a JW-BK200C  
137 instrument.

### 138 **Photocatalytic Experiments**

139 In this work, photo-degradation of micropollutants under weak visible light irradiation was  
140 employed to evaluate the photocatalytic performance of catalysts. 2.5 mg of photocatalysts were  
141 added to 50 mL of ultrapure water in a 50 mL beaker. The catalyst was dispersed by vortex for 30  
142 minutes and irradiated by a conventional lamp tube under magnetic stirring. The light intensity on  
143 the reaction interface was set to 2.0 mW cm<sup>-2</sup> except for the light intensity gradient experiment,  
144 which was measured with a solar power meter (Tenmars, TM-207). 1.0 mL of suspension solution  
145 was taken out during irradiation and filtered by 0.45  $\mu$ m PTFE hydrophilic filter at predefined  
146 time intervals. Then the solution was desorbed in acetonitrile to determine the percentage of  
147 adsorption and degradation in the removal of bisphenol A (BPA), the sampling method was the  
148 same as mentioned above. Other micropollutants degradation was performed in a similar way as  
149 BPA except that they reacted in darkness for 120 minutes before irradiation to achieve  
150 adsorption-desorption equilibrium.

151 The radical scavengers quenching experiments were performed using 10 mM silver nitrate  
152 ( $\text{AgNO}_3$ ), ethylenediaminetetraacetic acid disodium salt (EDTA-2Na), tert-butyl alcohol (TBA),  
153 and L-histidine to quench electrons, holes,  $\cdot\text{OH}$ , and  $^1\text{O}_2$ , respectively. 50 U  $\text{mL}^{-1}$  superoxide  
154 dismutase (SOD) and catalase were used as quenchers for  $\text{O}_2^{\cdot-}$  and  $\text{H}_2\text{O}_2$ , respectively. The  
155 quenchers were added before the reaction began and other conditions remained the same. For  
156 deferoxamine mesylate salt (DFO), a semiquinone free radical quencher was added after the  
157 solution reaction in the dark for 30 minutes to ensure that DFO would not affect the adsorption of  
158 BPA.

159 For the control experiment under an oxygen/argon atmosphere, the reaction solutions were  
160 bubbled with  $\text{O}_2/\text{Ar}$  for 30 minutes before the reaction began, and oxygen or argon gas was  
161 continuously bubbled into the system during the experiment. Other conditions remain the same.

162 Each group of experiments was repeated twice to ensure the repeatability and accuracy of the  
163 experiment. The results were expressed as average values with error bars displaying the standard  
164 deviation.

### 165 **Electrochemical measurements**

166 All measurements were carried out using an electrochemical workstation (CHI 660E Instruments  
167 or CHI 760E Instruments). A three-electrode cell system was employed including an Ag/AgCl  
168 reference electrode, a counter electrode of Pt foil, and a working electrode. A 300 W Xe lamp ( $\lambda >$   
169 400 nm) was used as an illumination source and adjusted the light source distance so that the light  
170 intensity was 20-30  $\text{mW cm}^{-2}$ .

171 For the photocurrent measurement, the FTO glass ( $1 \times 1$  cm) deposited with materials was used as  
172 photoelectrode. The three electrodes were inserted in a quartz cell filled with 0.1 M  $\text{Na}_2\text{SO}_4$ .



173 During the test, the system was purged with N<sub>2</sub>. 0.5 M Na<sub>2</sub>SO<sub>4</sub> was used as the electrolyte for the  
174 EIS and Mot-Schottky curve. Glassy carbon electrodes and FTO glass (1 × 1 cm) deposited with  
175 materials were used as photoelectrode, respectively. CV measurement was conducted in 0.1 M  
176 KCl at a sweep rate of 50 mV s<sup>-1</sup>. Glassy carbon electrodes deposited with materials were used as  
177 photoelectrode and the voltage was swept from -1 V to 1.8 V (vs Ag/AgCl).

178 All materials were prepared by adding 2 mg catalyst into the solution containing 180 μL ethanol  
179 and 20 μL 5% Nafion. The mixture was dispersed by ultrasonication.

## 180 **EPR Analysis**

### 181 **In-situ EPR to monitor the reaction between OCORs and BPA**

182 EPR was used to explore the role of OCORs in the photocatalytic degradation of BPA. A certain  
183 amount of material solution was drawn up in a capillary tube, transferred to a quartz tube, and  
184 placed in the sample chamber. The EPR signal was initially recorded in the dark, then the BPA  
185 solution was added and the material solution was continuously illuminated. The EPR signals were  
186 recorded at regular intervals.

187 The materials solution was prepared by adding 10 mg catalysts into 0.1 mL ultrapure water and  
188 dispersed by ultrasonication.

### 189 **The relationship between OCORs concentration and excitation wavelength and excitation** 190 **light intensity**

191 The relation between OCORs concentration and excitation wavelength and excitation light  
192 intensity was investigated using EPR. A certain amount of material solution was drawn up in a  
193 capillary tube, transferred to a quartz tube, and placed in the sample chamber. The EPR signal was  
194 recorded at room temperature without additional light source as control, then the EPR signal was

195 measured after irradiating the material solution for 60 s at different excitation wavelengths and  
196 excitation light intensities. The relationship between EPR signal increase and excitation light and  
197 excitation wavelength was compared.

198 The materials solution was prepared by adding 10 mg TPE-AQ into 0.1 mL ultrapure water and  
199 dispersed by ultrasonication.

#### 200 **Oxygen-centered organic radicals (OCORs) lifetime**

201 In-situ EPR was used to record the signals of OCORs and their lifetimes. For the solid EPR test,  
202 20 mg of materials were directly weighed into the quartz tube and placed in the sample chamber.  
203 The EPR signals were originally recorded in dark conditions. Following that, the signals were  
204 monitored under continuous in-situ irradiation with a conventional lamp tube, and the signal  
205 changes were recorded at intervals of irradiation. After 30 minutes of irradiation, the changes in  
206 OCORs concentration were tracked by monitoring the signal intensity changes after the light  
207 source was removed.

208 For the test of TPE-AQ lifetime in water, a certain amount of material solution was drawn up in a  
209 capillary tube, transferred to a quartz tube, and placed in the sample chamber. The test method was  
210 the same as the solid in-situ EPR, and the TPE-AQ solution was prepared following the same steps  
211 as described earlier.

#### 212 **The electron storage characteristic in TPE-AQ**

213 EPR was used to investigate the electron storage characteristic in TPE-AQ. A certain amount of  
214 material solution was drawn up in a capillary tube, placed into a quartz tube, and inserted into the  
215 sample chamber. The EPR signal was originally recorded in the dark. Then the solution was  
216 illuminated for 30 minutes and tested. Following that, the light source was turned off and 0.01 mL

217 of phenol solution (0.5 M) was added, the reaction was darkened for 30 minutes and examined.  
218 The variations in the EPR signal of blank, light for 30 minutes, and reaction in dark with or  
219 without phenol for 30 minutes were compared.

220 The preparation of the catalyst solution followed the same steps as described earlier.

### 221 **Detect of transient reactive Species ( $\cdot\text{OH}$ , $\text{O}_2^{\cdot-}$ , $^1\text{O}_2$ )**

222 To examine the reactive species in the photocatalytic process, 5,5-dimethyl-1-pyrroline-N-oxide  
223 (DMPO) was used as a trapping agent to detect DMPO- $\cdot\text{OH}$  and DMPO- $\text{O}_2^{\cdot-}$  adducts in aqueous  
224 solution and methanol, respectively. 2,2,6,6-tetramethylpiperidine (TEMP) was employed as the  
225 spin capture reagent to detect the  $^1\text{O}_2$  in an aqueous solution. A conventional lamp tube was used  
226 to provide the light source. After irradiation for a certain time, 0.5 mL of the reaction liquid was  
227 filtered and added into a centrifuge tube containing the trapping agent and mixed, then the  
228 appropriate amount of the mixture was drawn up in a capillary tube, placed into a quartz tube and  
229 inserted into the sample chamber, the spectra were recorded.

### 230 **Recycling Experiments**

231 TPE-AQ recycling studies were carried out as follows: Suction filtering was used to separate the  
232 TPE-AQ from the desorption solution after a photocatalytic cycle. After washing with ethanol, the  
233 residual catalyst was dried at 80 °C and collected for the next recycling test.

### 234 **Determination of $\text{H}_2\text{O}_2$ concentration**

235 The amount of  $\text{H}_2\text{O}_2$  was measured using a TMB- $\text{H}_2\text{O}_2$ -HRP enzymatic assay, and the horseradish  
236 peroxidase (HRP) could catalyze the reaction between  $\text{H}_2\text{O}_2$  and TMB:

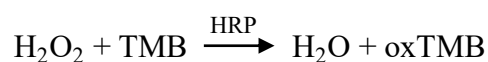

237 The 3,3',5,5'-tetramethylbenzidine (TMB) solution was prepared as follows: 0.015 g TMB was

238 dissolved in 0.3 mL of DMSO, then adding 5 mL of glycerol and 45 mL of ultrapure water  
239 containing 0.02 g of ethylenediaminetetraacetic acid and 0.095 g of citric acid. Then the solution  
240 was filled to 500 mL with ultrapure water.

241 HRP solution was made by dissolving 0.002 g of peroxidase (from horseradish) in 10 mL of  
242 ultrapure water.

243 The calibration curve was determined in the following method: TMB and HRP were added to a  
244 known concentration of H<sub>2</sub>O<sub>2</sub> solution. After 3 minutes, 10 μL of HCl was added to quench the  
245 reaction, and the results were analyzed using UV-visible spectroscopy at 450 nm. The H<sub>2</sub>O<sub>2</sub>  
246 concentration of the samples could be calculated using the linear relationship between signal  
247 intensity and H<sub>2</sub>O<sub>2</sub> concentration.

#### 248 **Evaluation of KIE (Kinetic Isotope Effect)**

249 The reaction rate was evaluated by a pseudo-first-order kinetics model:

$$250 \qquad \qquad \qquad \ln(C_t/C_0) = -k_{\text{obs}}t \qquad \qquad \qquad (1)$$

251 Where C<sub>0</sub> was the pollutant concentration after adsorption, and C<sub>t</sub> was the concentration at a  
252 certain time during the photocatalytic degradation process.

253 The KIE equation was as follows:

$$254 \qquad \qquad \qquad \text{KIE} = k_{\text{obs(H)}}/k_{\text{obs(D)}} \qquad \qquad \qquad (2)$$

255 Where the k<sub>obs(H)</sub> and k<sub>obs(D)</sub> were the kinetic rate constants of phenol and phenol-D6 degradation,  
256 respectively.

#### 257 **Analytical methods**

258 Micropollutant concentrations were determined using high-performance liquid chromatography  
259 (HPLC, UltiMate TM 3000, Thermo Fisher Scientific Inc., USA). Chromatographic separation

260 was performed on a CNW Athena C18-WP column ( $4.6 \times 150$  mm,  $5 \mu\text{m}$ ), and the HPLC method  
261 for each micropollutant was shown in Table S2. The concentration of the total organic carbon  
262 (TOC) in the filtered reaction solution was measured using a TOC analyzer (TOC-L CPH,  
263 Shimadzu, Japan). Ultrahigh-performance liquid chromatography coupled with trapped ion  
264 mobility time-of-flight mass spectrometer (UltiMate3000-tims TOF) was used for the  
265 identification of BPA degradation products, the test method of ion mobility Q-TOF high resolution  
266 liquid chromatography mass spectrometry is as follows: Mobile phase A is 0.1% formic acid water,  
267 mobile phase B is 0.1% formic acid acetonitrile solution, and the gradient is set as 90% mobile  
268 phase A and 10% mobile phase B at 0-1 min, and 5% mobile phase A and 95% mobile phase B at  
269 9.5 min and maintained until 12 min. At 12.1 minutes, 90% mobile phase A and 10% mobile phase  
270 B were maintained for 15 min with a flow rate of  $0.3 \text{ mL min}^{-1}$ . ESI negative ion and positive ion  
271 modes were used for mass spectrum scanning. The ion source temperature was  $120 \text{ }^\circ\text{C}$ , the  
272 capillary voltage was 2500 V, the cone hole voltage was 35 V, the desolvation temperature was  
273  $300 \text{ }^\circ\text{C}$ , the cone hole gas flow rate was  $40 \text{ L h}^{-1}$ , the desolvation gas flow rate is  $700 \text{ L}$   
274  $\text{h}^{-1}$ (negative ion mode) and  $750 \text{ L h}^{-1}$ (positive ion mode), the nebuliser gas flow rate is 6.5 bar, the  
275 trap collision energy is 4.0 eV, and the scanning mass range is 50-1000 Da.

276

## 277 **Supplemental Notes**

### 278 **Supplemental Note 1. Charge carriers separation and transfer performance of CPs**

279 The overall recombination efficiencies of photo-induced carriers were monitored by steady-state  
280 photoluminescence (PL) emission spectroscopy (Figure S19). The PL intensity was negligible in  
281 TPE-AQ, while it was still significant in TPE-FN and TPE-AQ-molecule, indicating the highly  
282 improved the separation efficiency of photo-induced carriers in TPE-AQ. Temperature-dependent  
283 photoluminescence (PL) spectra were recorded to further elucidate the charge recombination and  
284 separation kinetics of CPs (Figs. 4d, e). Clearly, TPE-AQ and TPE-FN exhibited the thermal  
285 quenching phenomenon of PL emission in the temperature range from 125 to 300 K. By fitting the  
286 PL intensities as a function of temperature using the Arrhenius equation (equation S3), the exciton  
287 activation energy ( $E_a$ ) of TPE-AQ and TPE-FN could be deduced as 158 and 200 meV,  
288 respectively<sup>1</sup>. The lower  $E_a$  implied better charge separation in TPE-AQ.

$$289 \quad I(T) = I_0 / (1 + A \exp(-E_b/k_b T)) \quad (3)$$

290 Moreover, photoelectrochemical characterizations provided further significant evidence (Figure  
291 S20). The photocurrent experimental results revealed that TPE-AQ displayed a higher  
292 photocurrent response, signifying less recombination and faster photo-induced electron migration  
293 in TPE-AQ. Similarly, TPE-AQ also manifested a smaller radius of the semi-circular Nyquist plot  
294 than TPE-FN in electrochemical impedance spectroscopy (EIS) measurements, suggesting a lower  
295 charge transfer resistance in TPE-AQ. All of these results are consistent with the conclusions  
296 drawn from PL analyses that less recombination and better charge carriers separation in TPE-AQ,  
297 which could have a positive effect on the photocatalytic activity.

### 298 **Supplemental Note 2. Attribution of signals in transient absorption spectra**

299 As shown in Figures. S21 and S24, the peaks on about 650 nm could be attributed to polarons for  
300 TPE-AQ. Because it decreased significantly in both electron ( $\text{AgNO}_3$ ) and hole (EDTA-2Na)  
301 sacrificial agents. On the other hand, peaks between 850 nm and 1300 nm could be assigned to  
302 unfettered holes. Because the signal was not significantly attenuated in the presence of an electron  
303 sacrificial agent but obviously decreased in the presence of a hole sacrificial agent.

304

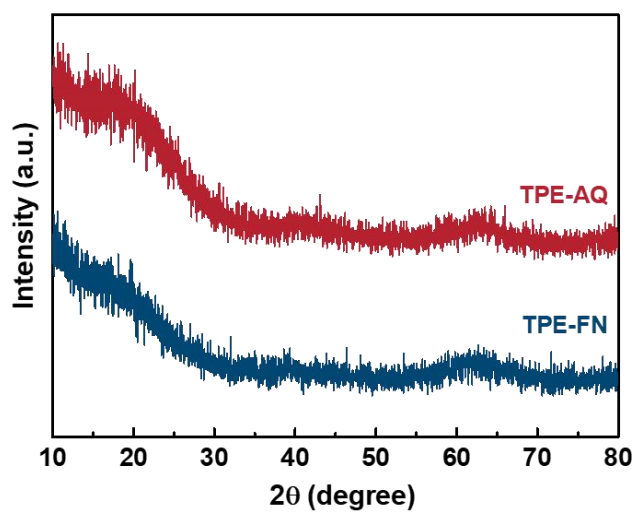

306

307 **Figure S1. PXRD patterns of TPE-AQ and TPE-FN.** The powder X-ray diffraction (PXRD)

308 profiles revealed that TPE-AQ and TPE-FN exhibited the features of amorphous carbon.

309



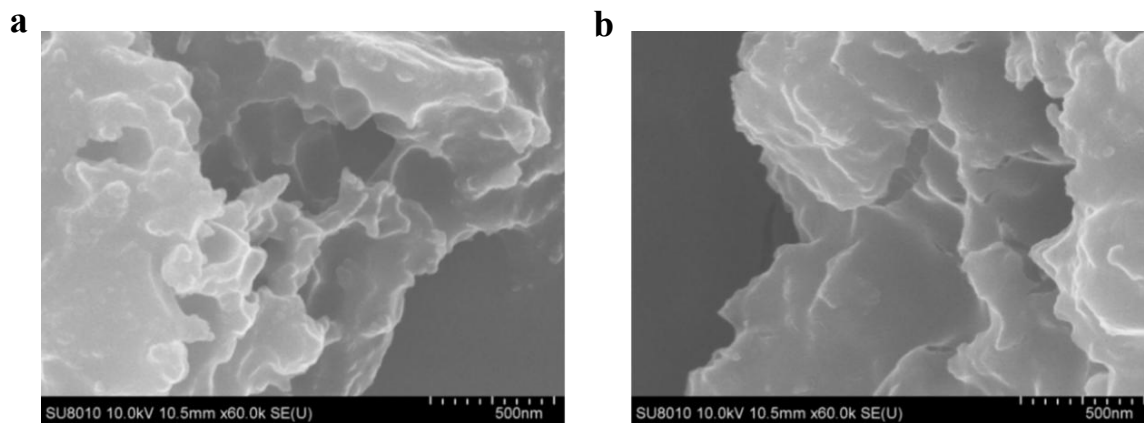

310

311 **Figure S2. Scanning electron microscope (SEM) images of CPs.** SEM images of (a) TPE-AQ

312 and (b) TPE-FN. The SEM images indicated the CPs were stratified structures.

313

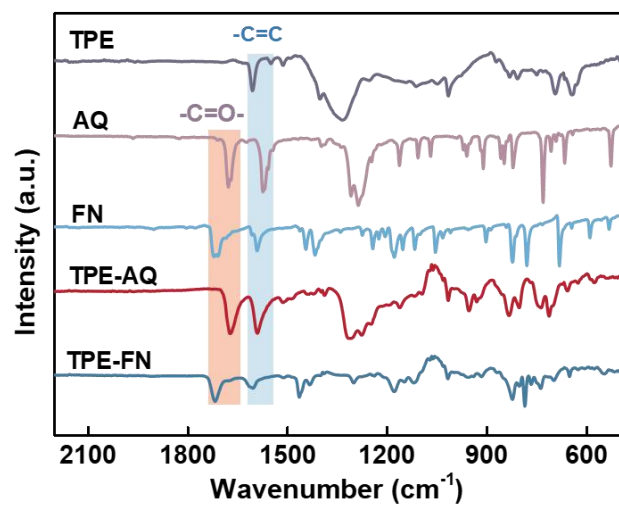

314

315 **Figure S3. FT-IR spectra of TPE-AQ, TPE-FN, and monomer.** The peaks at 1671 cm<sup>-1</sup> and

316 1716 cm<sup>-1</sup> were attributed to the carbonyl group in TPE-AQ and TPE-FN, respectively. The signal

317 at 1590 cm<sup>-1</sup> corresponded to the stretching vibration of C=C bonds in the aromatic skeletons.

318

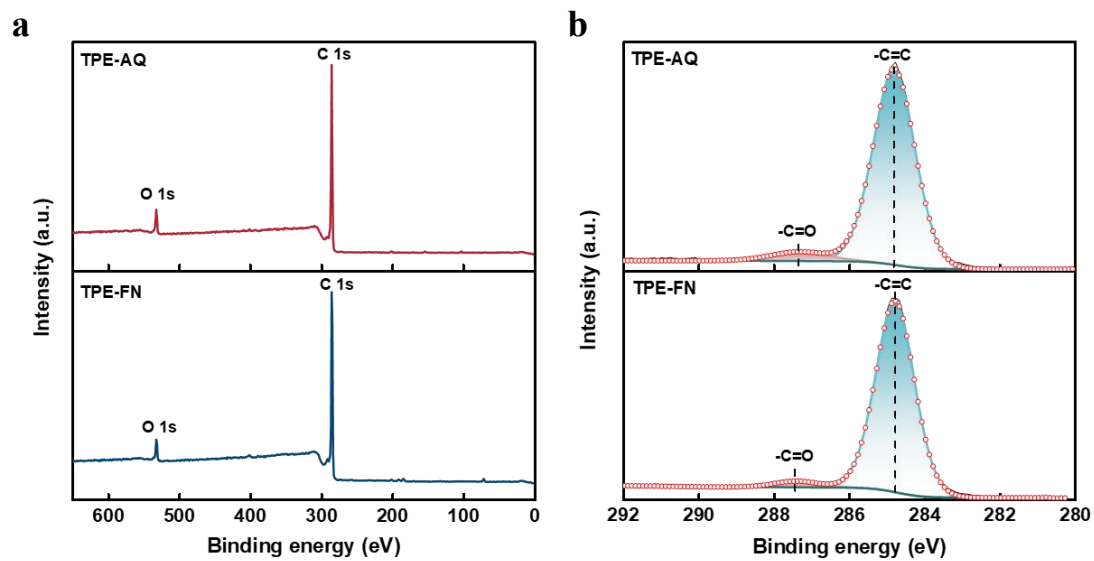

319

320 **Figure S4. The XPS spectra of TPE-AQ and TPE-FN. (a) The survey XPS spectra. (b) The**

321 high-resolution C 1s XPS spectra.

322

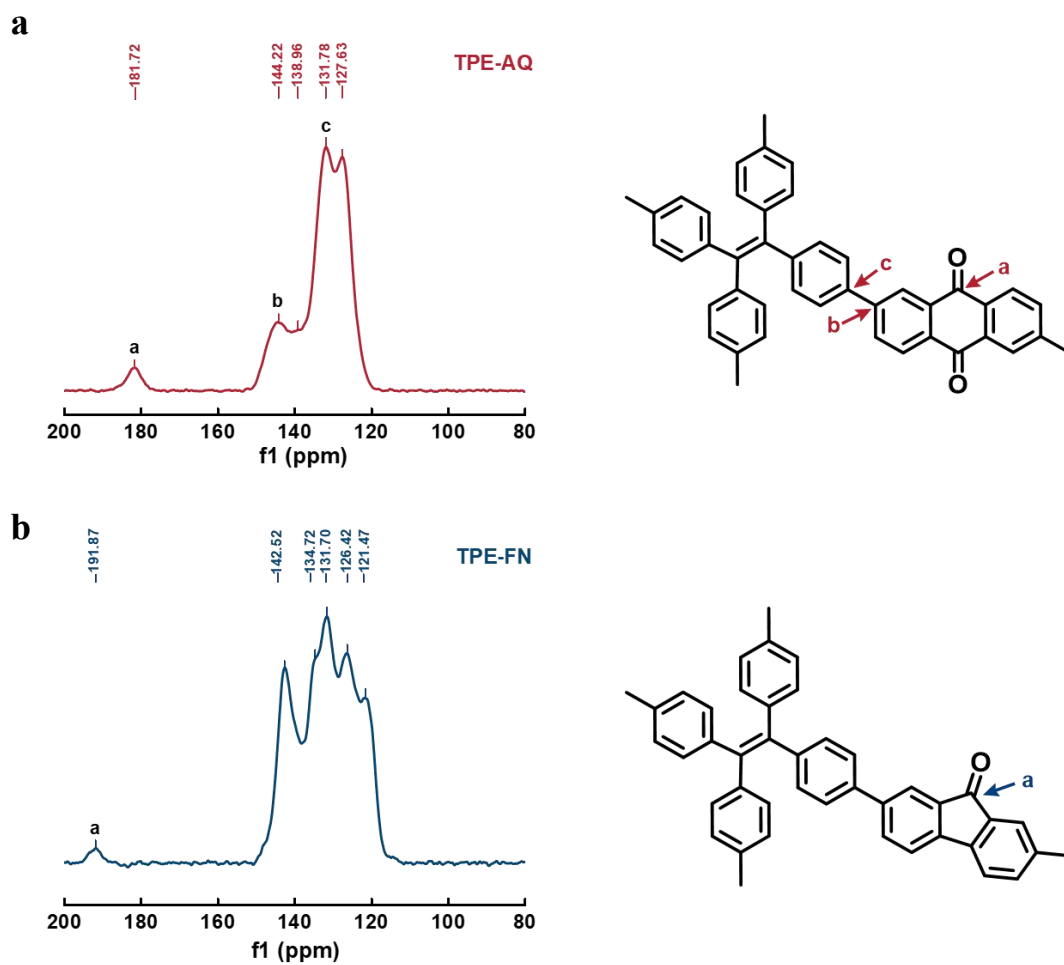

323 **Figure S5. Solid state  $^{13}\text{C}$  CP-MAS NMR spectra. Spectra of (a) TPE-AQ, (b) TPE-FN.**

324

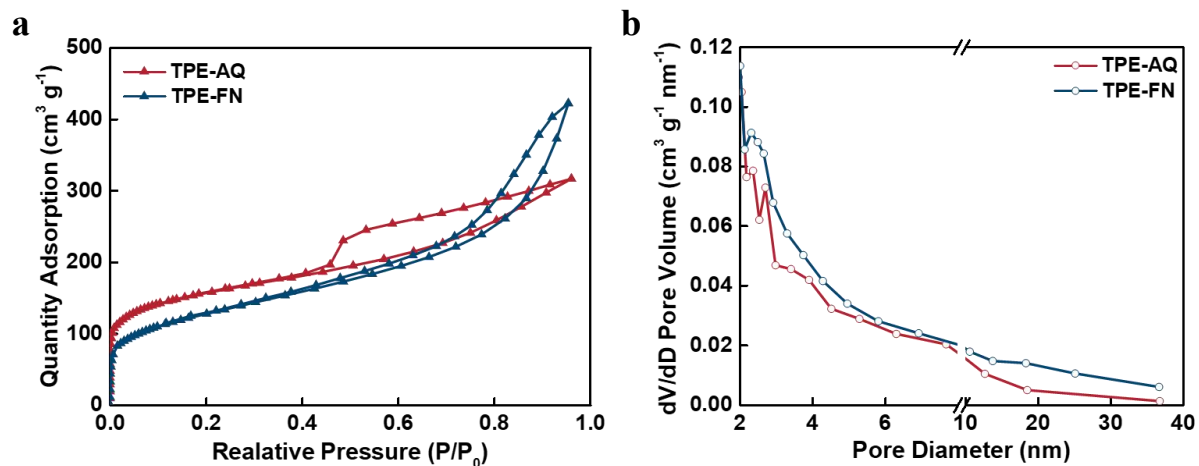

325

|                                                            | TPE-AQ  | TPE-FN  |
|------------------------------------------------------------|---------|---------|
| <b>BET Surface (<math>\text{m}^2 \text{g}^{-1}</math>)</b> | 564.124 | 457.804 |
| <b>Pore Diameter (nm)</b>                                  | 2.0501  | 2.0080  |

326 **Figure S6. Measurements of Brunauer-Emmett-Teller surface areas.** (a)  $\text{N}_2$   
 327 adsorption-desorption isotherms; (b) The corresponding pore size distributions of TPE-AQ and  
 328 TPE-FN.  
 329

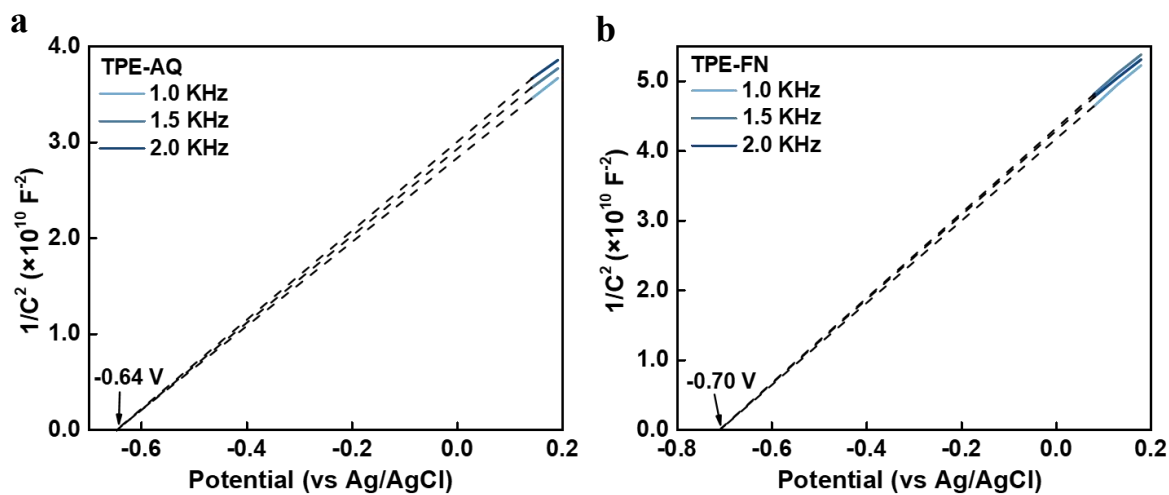

330 **Figure S7. Characterization of CBM through Mott Schottky.** Mott Schottky plots of (a)  
 331 TPE-AQ and (b) TPE-FN. The FTO glasses deposited with materials were used as photoelectrode.  
 332 The three electrodes were inserted in a quartz cell filled with 0.5 M Na<sub>2</sub>SO<sub>4</sub>. The flat-band values  
 333 were evaluated as -0.64 and -0.70 eV versus the Ag/AgCl electrode.  
 334

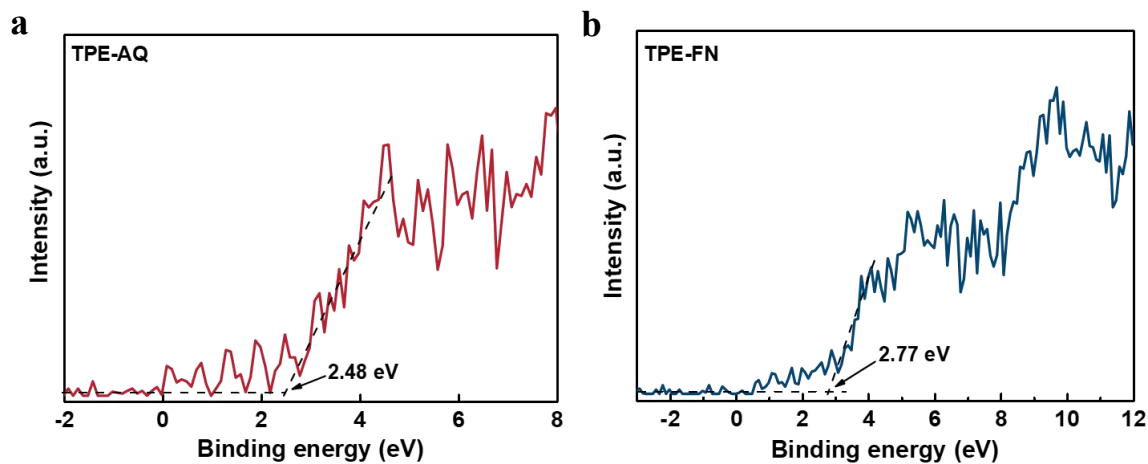

335 **Figure S8. XPS valence band spectrum of CPs.** The spectrum of (a) TPE-AQ and (b) TPE-FN.  
336 The valence band maximum (VBM) of TPE-AQ and TPE-FN were determined to be 2.48 and  
337 2.77 eV verse Fermi level, respectively.  
338

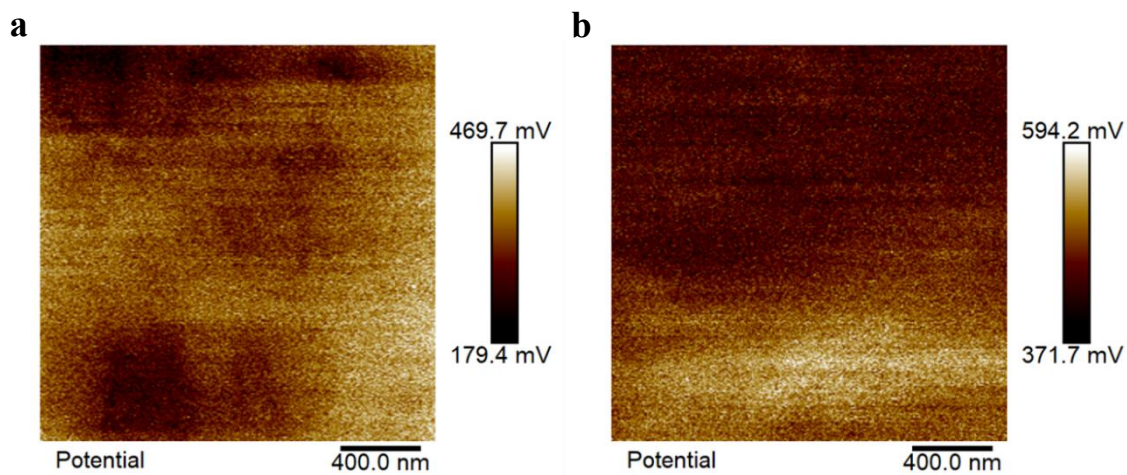

339

340 **Figure S9. Characterization of sample work function through Kelvin Probe Force**

341 **Microscopy (KPFM).** AM-KPFM images of (a) TPE-AQ and (b) TPE-FN. The work function of

342 TPE-AQ and TPE-FN were measured to be 4.233 and 4.093 eV, respectively.

343



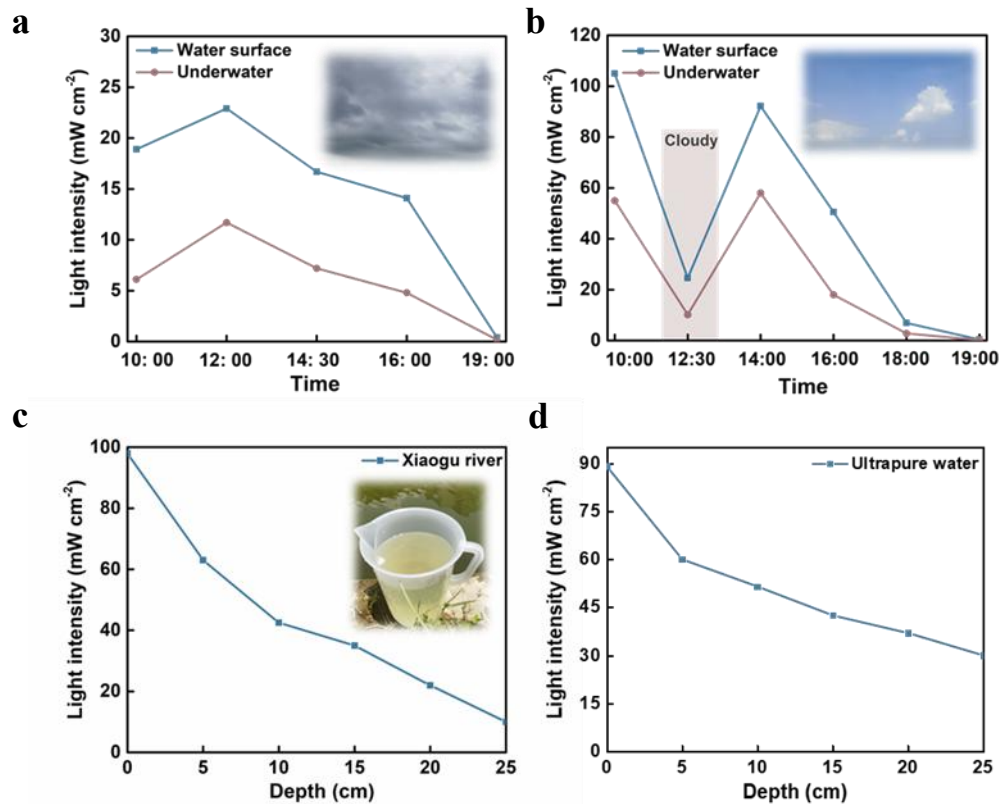

344

345 **Figure S10. Solar irradiance levels under various environmental conditions.** Variation of light  
 346 intensity on the water surface and depth of 19 cm underwater on cloudy (a) and sunny days (b).

347 The attenuation of light intensity with depth in actual water (c) and ultrapure water (d).

348

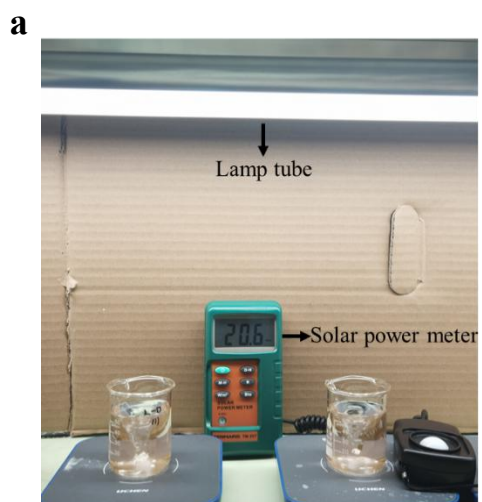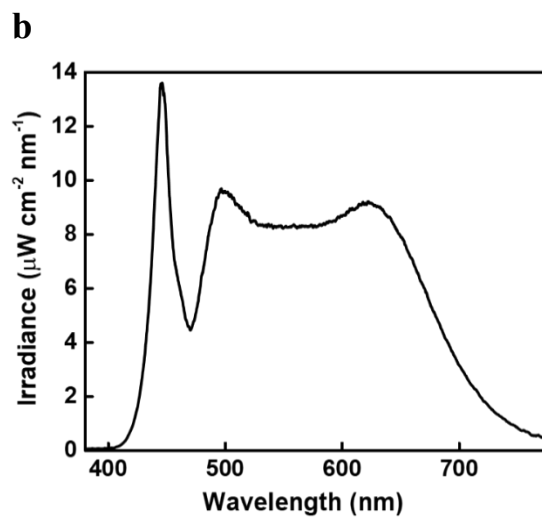

349

350 **Figure S11. The experimental device and light source spectrum.** Experimental device for

351 photocatalytic degradation of CPs **(a)** and spectrogram of lamp tube **(b)**.

352

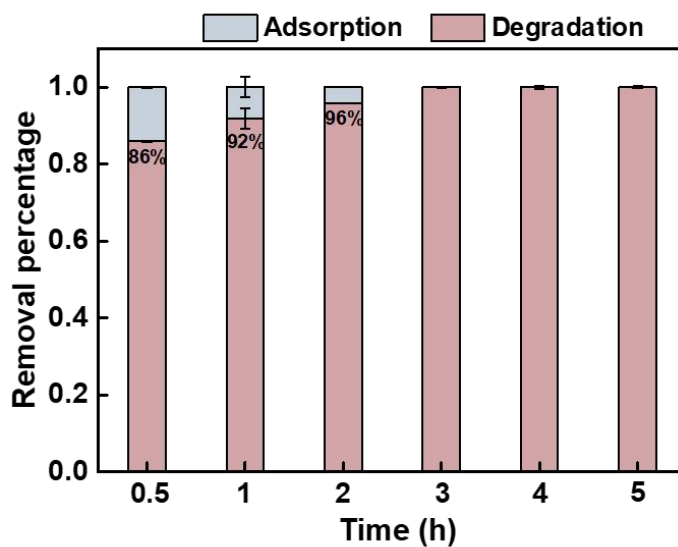

353

354 **Figure S12. Reaction condition gradient experiments.** Effects of reaction time on photocatalytic  
355 degradation of BPA by TPE-AQ. Reaction conditions were: [BPA] = 2  $\mu\text{M}$ , [photocatalyst] = 0.05  
356  $\text{g L}^{-1}$ ,  $I_0 = 2.0 \text{ mW cm}^{-2}$ , [reaction time] = 1-5 h.

357

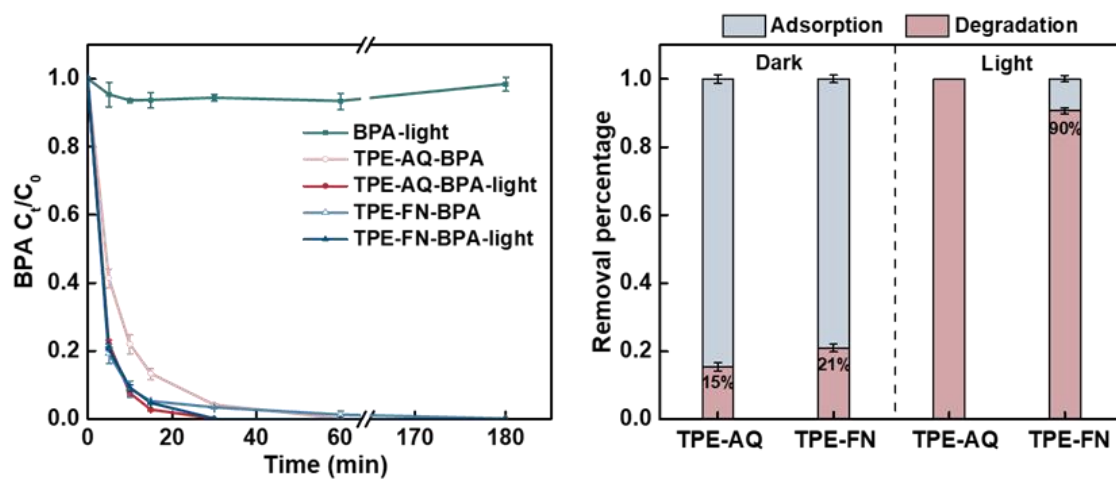

358 **Figure S13. The photocatalytic performance of CPs for BPA degradation.** Reaction conditions  
 359 were: [BPA] = 2  $\mu\text{M}$ , [photocatalyst] = 0.05  $\text{g L}^{-1}$ , [reaction time] = 3 h,  $I_0 = 2.0 \text{ mW cm}^{-2}$ .  
 360

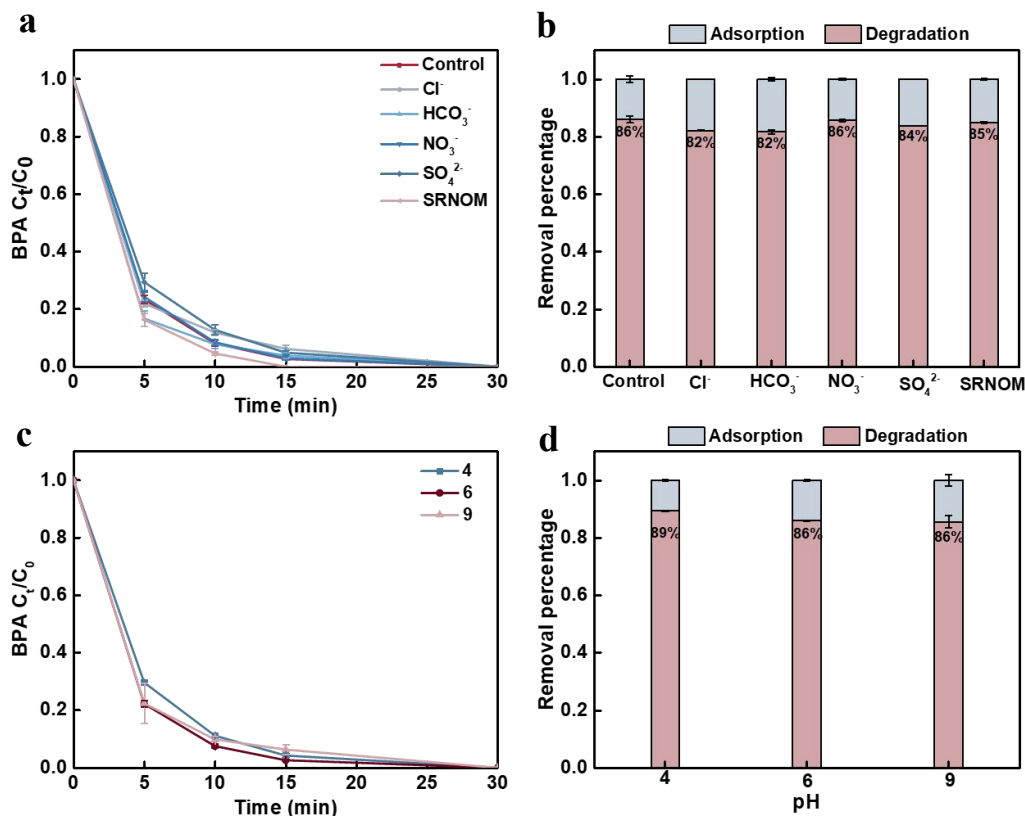

361

362 **Figure S14. The withstand interference ability test.** Effect of (a-b) water matrix components  
 363 (coexisting anions and SRNOM) and (c-d) pH on the photocatalytic performance of TPE-AQ.  
 364 Reaction conditions were: (a-b) [BPA] = 2 μM, [photocatalyst] = 0.05 g L<sup>-1</sup>, [anions] = 5 mM,  
 365 [SRNOM] = 5 mg<sub>C</sub> L<sup>-1</sup>, [reaction time] = 30 min, I<sub>0</sub> = 2.0 mW cm<sup>-2</sup>. (c-d) The condition was the  
 366 same as (a-b), except the pH was adjusted to 4-9 by NaOH and H<sub>2</sub>SO<sub>4</sub>. TPE-AQ demonstrated  
 367 exceptional resistance to interference.

368

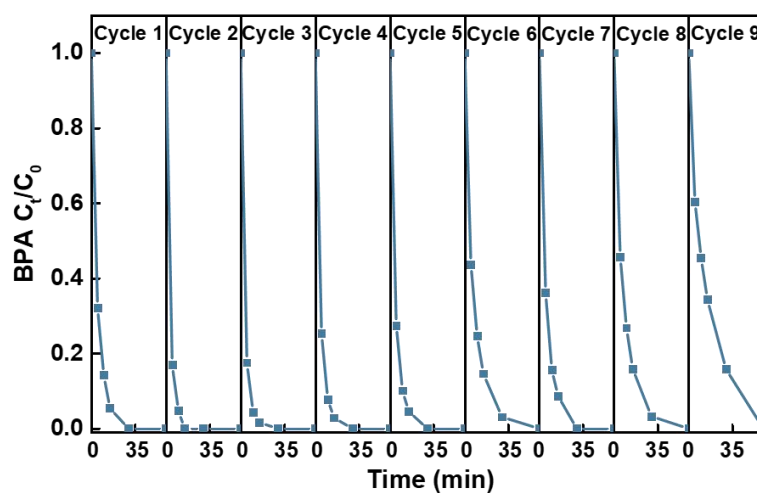

369

370 **Figure S15. Recycle experiments of TPE-AQ.** Reaction conditions were: [BPA] = 2  $\mu\text{M}$ ,  
 371 [TPE-AQ] = 0.05  $\text{g L}^{-1}$ , [reaction time] = 3 h,  $I_0 = 2.0 \text{ mW cm}^{-2}$ . TPE-AQ exhibited remarkable  
 372 stability over nine cycles.

373

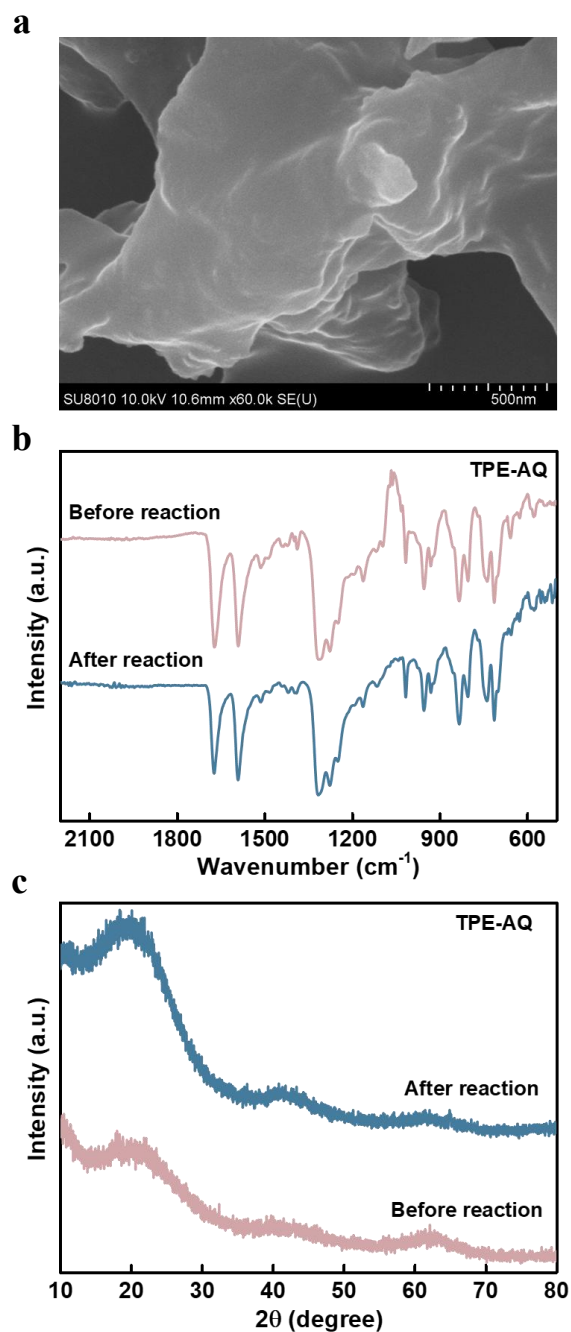

374

375 **Figure S16. Post-characterization of TPE-AQ after photocatalysis.** Comparison of TPE-AQ

376 before and after photoreaction: **(a)** SEM image, **(b)** FT-IR spectra, **(c)** PXRD. The composition

377 and structure of TPE-AQ remained unchanged after photocatalysis, this further demonstrated the

378 excellent cyclic stability of TPE-AQ.

379

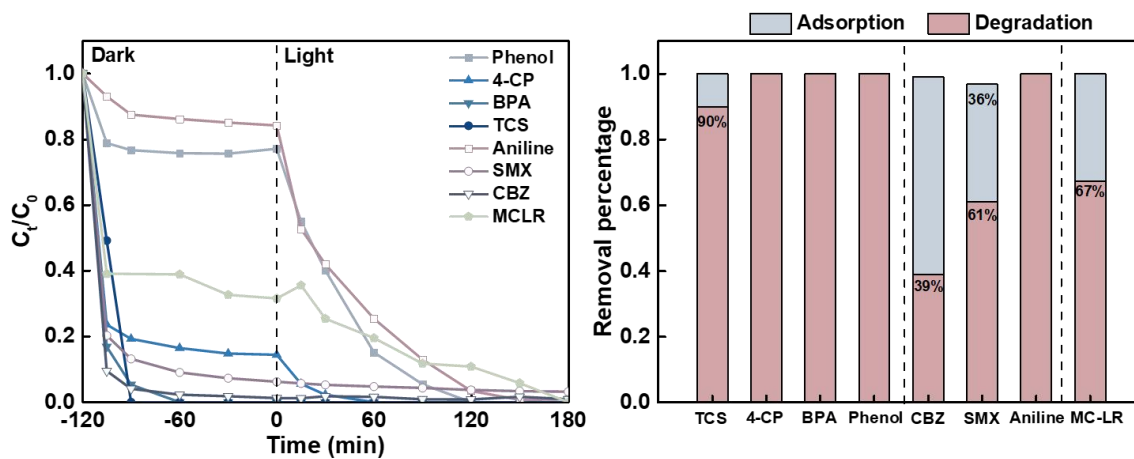

380 **Figure S17. Degradation of different micropollutants in the TPE-AQ system.** Reaction  
 381 conditions were: [pollutants] = 2  $\mu\text{M}$ , [TPE-AQ] = 0.05  $\text{g L}^{-1}$ , [reaction time] = 3 h,  $I_0 = 2.0 \text{ mW}$   
 382  $\text{cm}^{-2}$ . TPE-AQ showcased remarkable efficacy in degrading a wide range of organic pollutants.  
 383



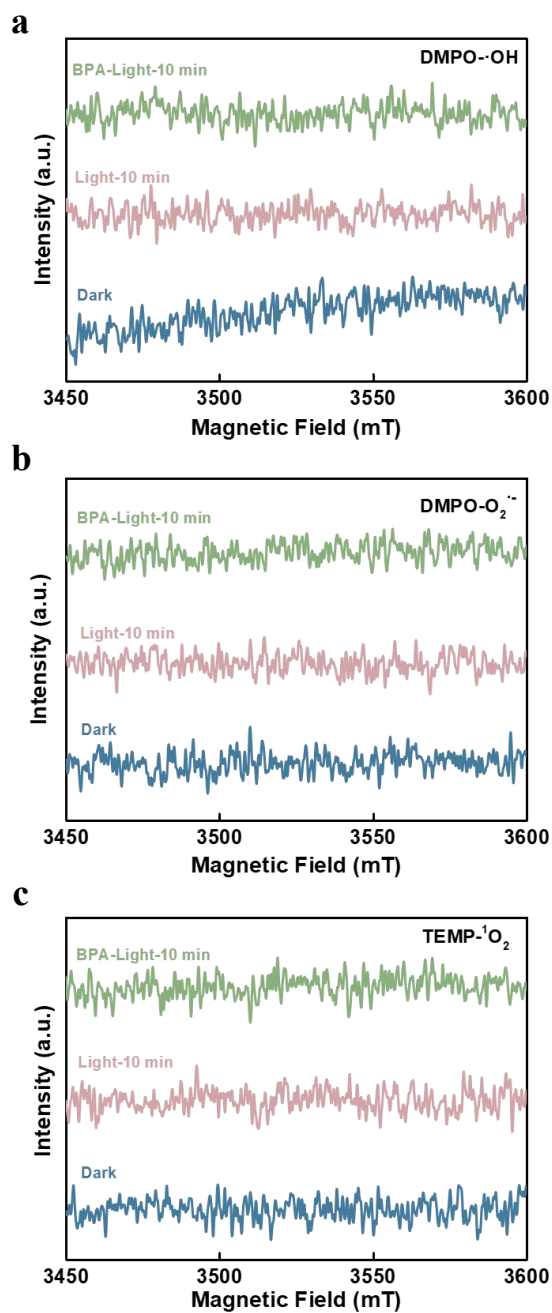

384

385 **Figure S18. EPR spectra of TPE-AQ.** EPR spectra of TPE-AQ in the presence of (a-b) DMPO

386 and (c) TEMP in the O<sub>2</sub> atmosphere. The results showed that superoxide radicals, singlet oxygen,

387 and hydroxyl radicals did not participate in the photocatalytic degradation of BPA, which was

388 consistent with the results of quenching experiment.

389

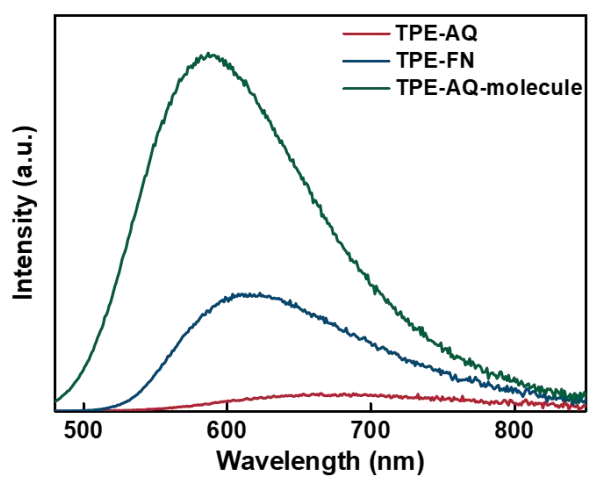

390

391 **Figure S19. Photoluminescence spectra of TPE-AQ, TPE-FN, and TPE-AQ-molecule.** The PL  
392 intensity was negligible in TPE-AQ compared to TPE-FN and TPE-AQ-molecule, indicating the  
393 better separation of photo-induced carriers in TPE-AQ.

394

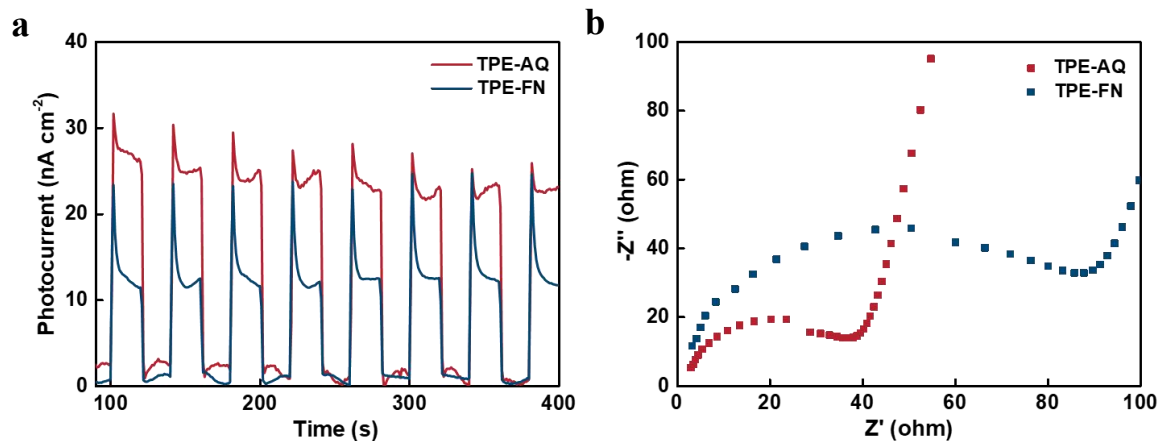

395 **Figure S20. Photocurrent responses and electrochemical impedance spectroscopy analysis.**

396 Photocurrent responses **(a)** and Electrochemical impedance spectra **(b)** of TPE-AQ and TPE-FN.

397 The Photocurrent responses measurements were performed on an FTO electrode in 0.1 M Na<sub>2</sub>SO<sub>4</sub>

398 solution and N<sub>2</sub> atmosphere and the EIS measurements were performed on a Glassy carbon

399 electrode in 0.5 M Na<sub>2</sub>SO<sub>4</sub> solution. The photocurrent responses and EIS all confirmed the better

400 separation of photo-induced carriers for TPE-AQ than TPE-FN.

401

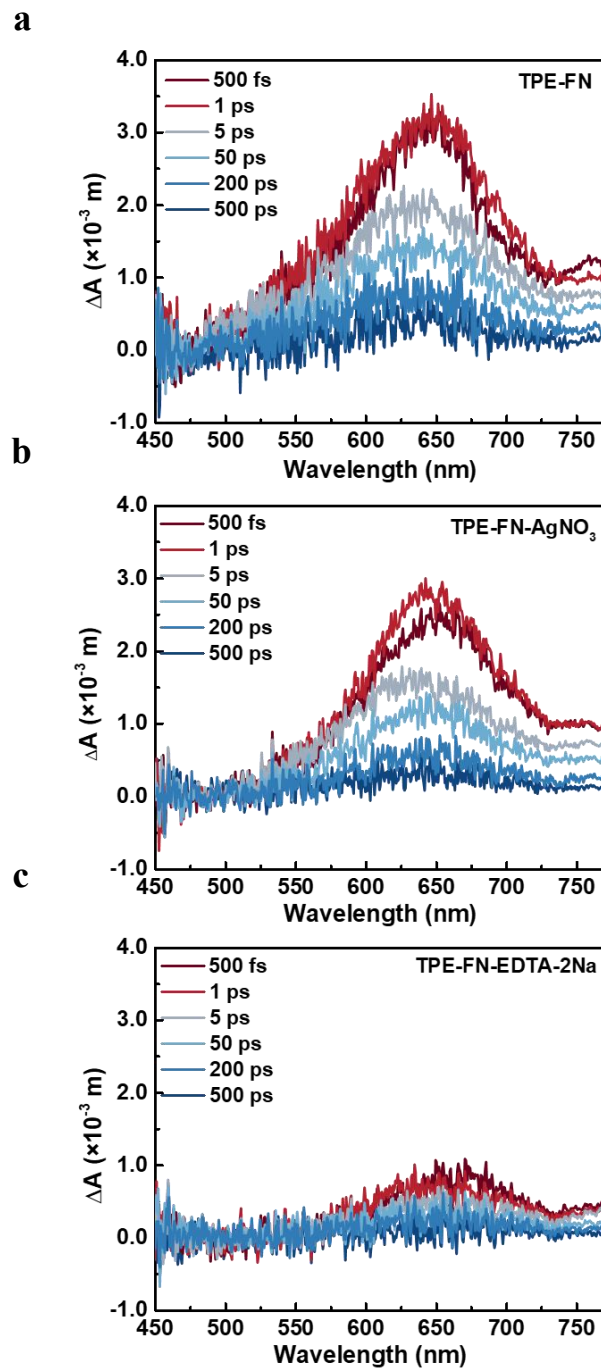

402

403 **Figure S21. Femtosecond transient absorption measurements probed at visible region.** The

404 transient absorption spectra of TPE-FN with different quenchers. TA details of CPs pumped at 400

405 nm. AgNO<sub>3</sub> and EDTA-2Na were all 10 mM.

406

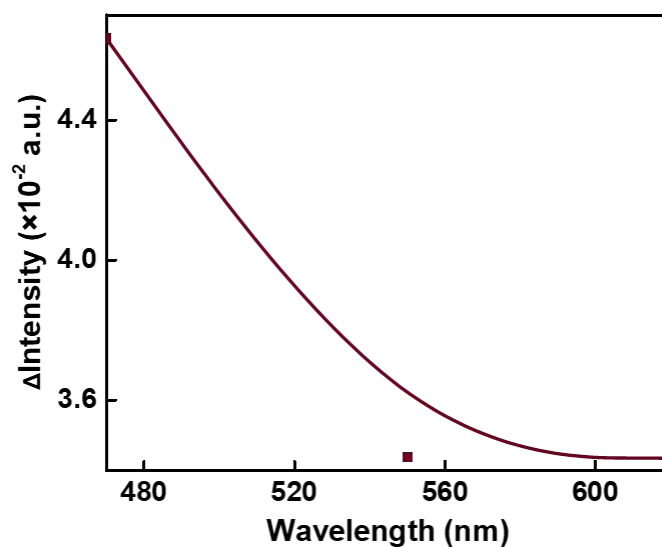

407

408

409 **Figure S22.  $\Delta$  EPR signal intensity as a function of excitation wavelength.** The EPR signal

410 was recorded at room temperature without additional light source as control, then the EPR signal

411 was measured after irradiating the material solution for 60 s at different excitation wavelengths.

412 The relationship between EPR signal (represented by the highest point of EPR signal strength,

413  $g=2.0063$ ) increase and excitation wavelength was compared. In the variation of EPR signal

414 intensity with different excitation wavelengths was consistent with TPE-AQ's optical absorption

415 spectrum.

416

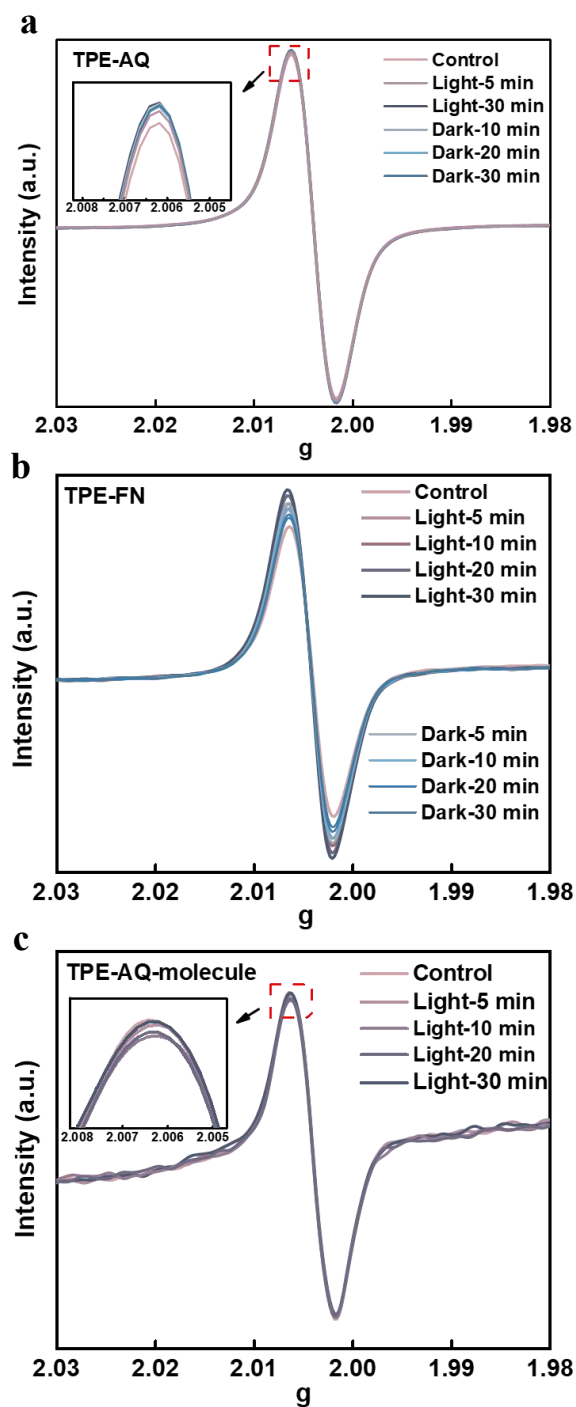

417

418 **Figure S23. The lifetime of OCORs.** The time-dependent in-situ solid EPR spectra of (a)  
 419 TPE-AQ, (b) TPE-FN, and (c) TPE-AQ-molecule. The light was turned off after the photocatalyst  
 420 (solid) was illuminated for 30 minutes. The lighting and dark processes were continually  
 421 monitored.

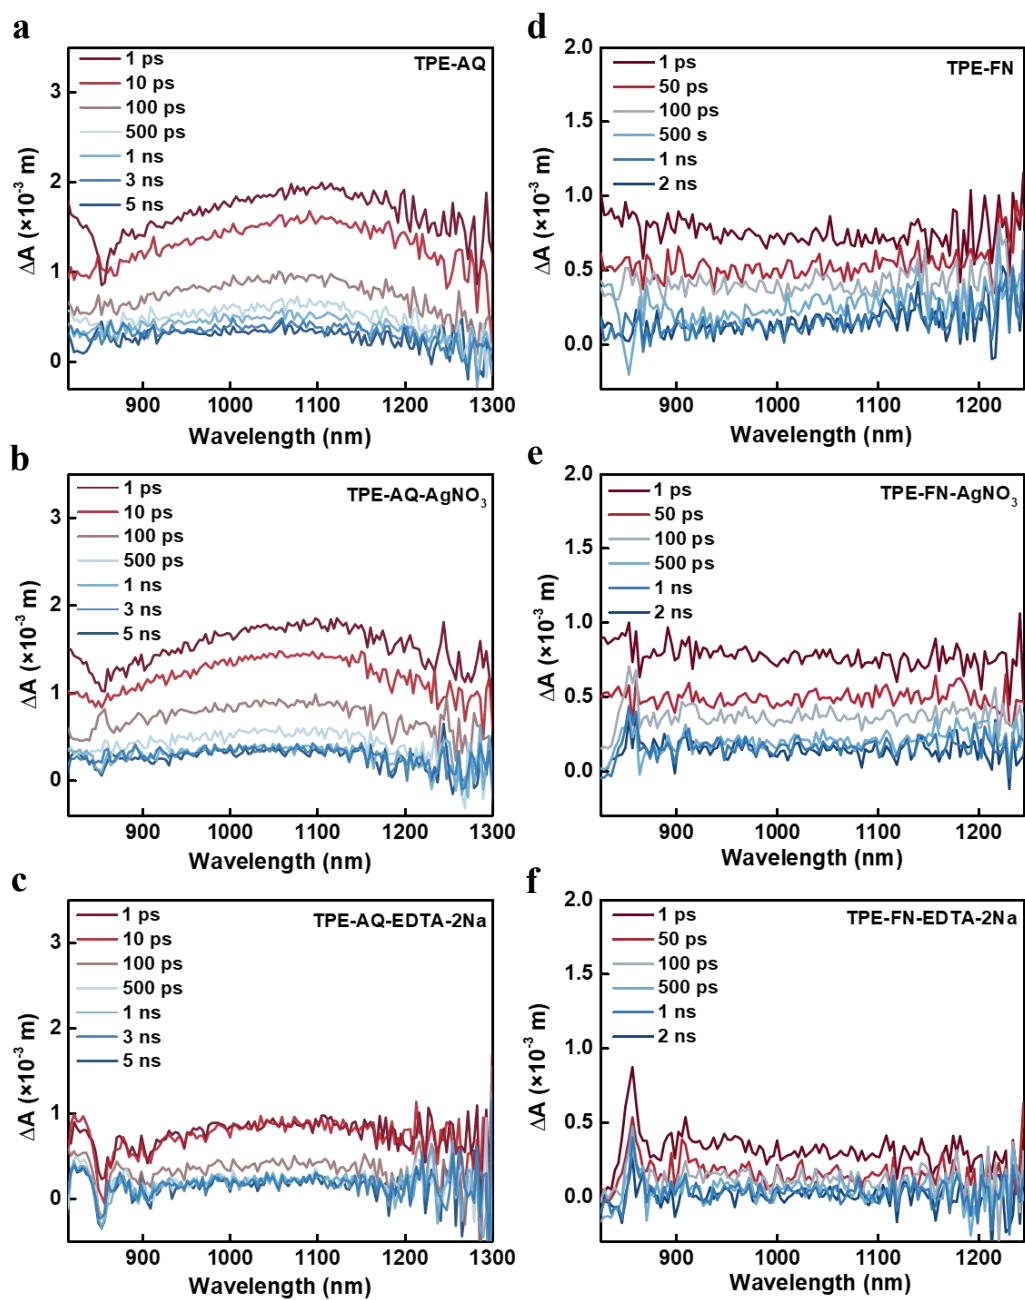

422

423 **Figure S24. Femtosecond transient absorption measurements probed at near-infrared region.**

424 The transient absorption spectra of TPE-AQ (a-c) and TPE-FN (d-f) with different quenchers. TA

425 details of CPs pumped at 400 nm. AgNO<sub>3</sub> and EDTA-2Na were all 10 mM.

426

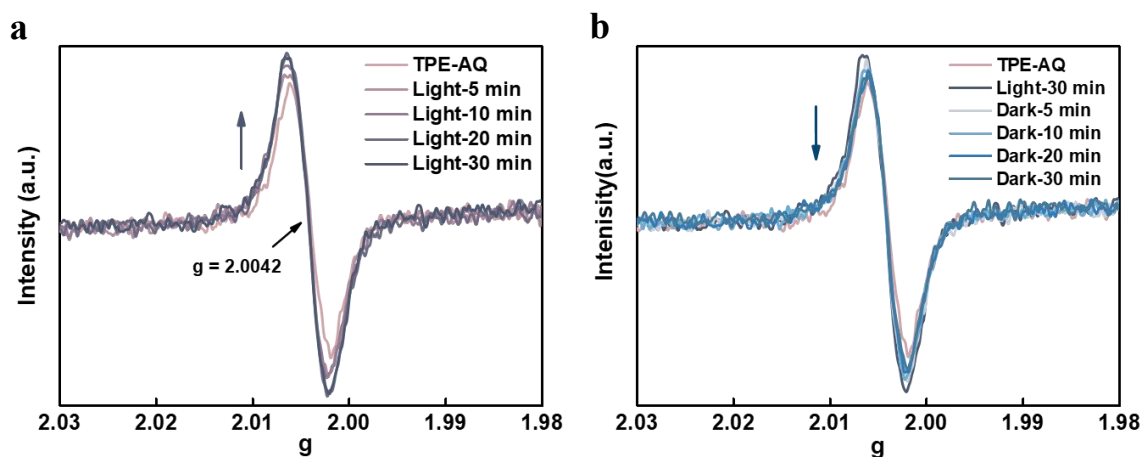

427 **Figure S25. The time-dependent in-situ EPR spectra of TPE-AQ in H<sub>2</sub>O.** After 30 minutes of  
 428 illumination of TPE-AQ, the light was turned off, and the lighting (a) and dark (b) processes were  
 429 continuously tracked. The EPR signal intensity decreased with time after the lamp was removed,  
 430 indicating the potential reactivity of OCORs with water.  
 431



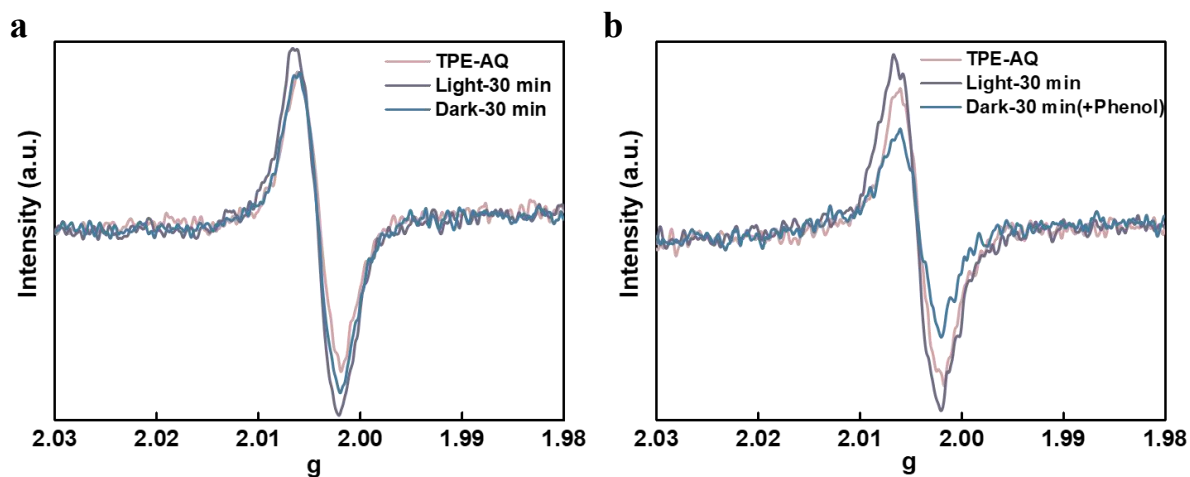

432 **Figure S26. Characterization of the electron storage properties of TPE-AQ.** EPR spectra of  
 433 light and dark processes of TPE-AQ-H<sub>2</sub>O in the absence **(a)** and presence **(b)** of phenol. Phenol  
 434 was added after turning off the light and reacted in dark conditions. After the light source was  
 435 removed, the presence of phenol accelerated the decay of the EPR signal with time, demonstrating  
 436 that the light-generated OCORs could be stored and reacted with phenol in a light-independent  
 437 process. The results showed that TPE-AQ had an electron storage ability.  
 438

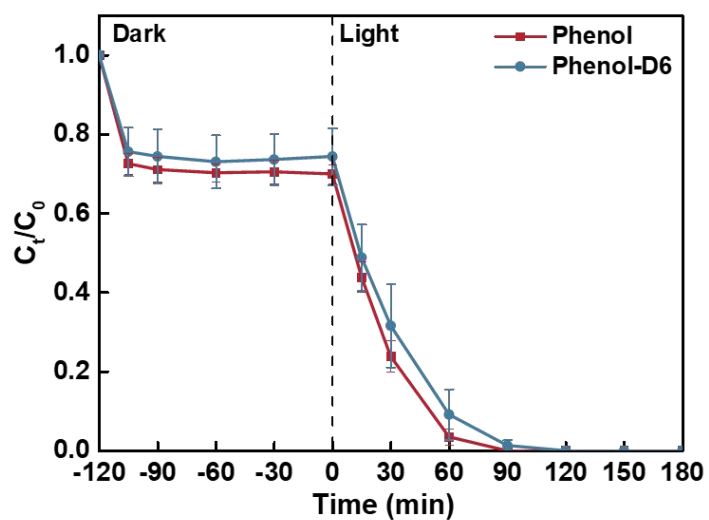

439

440 **Figure S27. H/D kinetic isotope effect for phenol degradation in TPE-AQ system.** The  
 441 temporal concentration changes of phenol as a function of reaction time. Reaction conditions were:

442  $[\text{phenol}] = [\text{phenol-D6}] = 2 \mu\text{M}$ ,  $[\text{TPE-AQ}] = 0.05 \text{ g L}^{-1}$ ,  $I_0 = 2.0 \text{ mW cm}^{-2}$ .

443

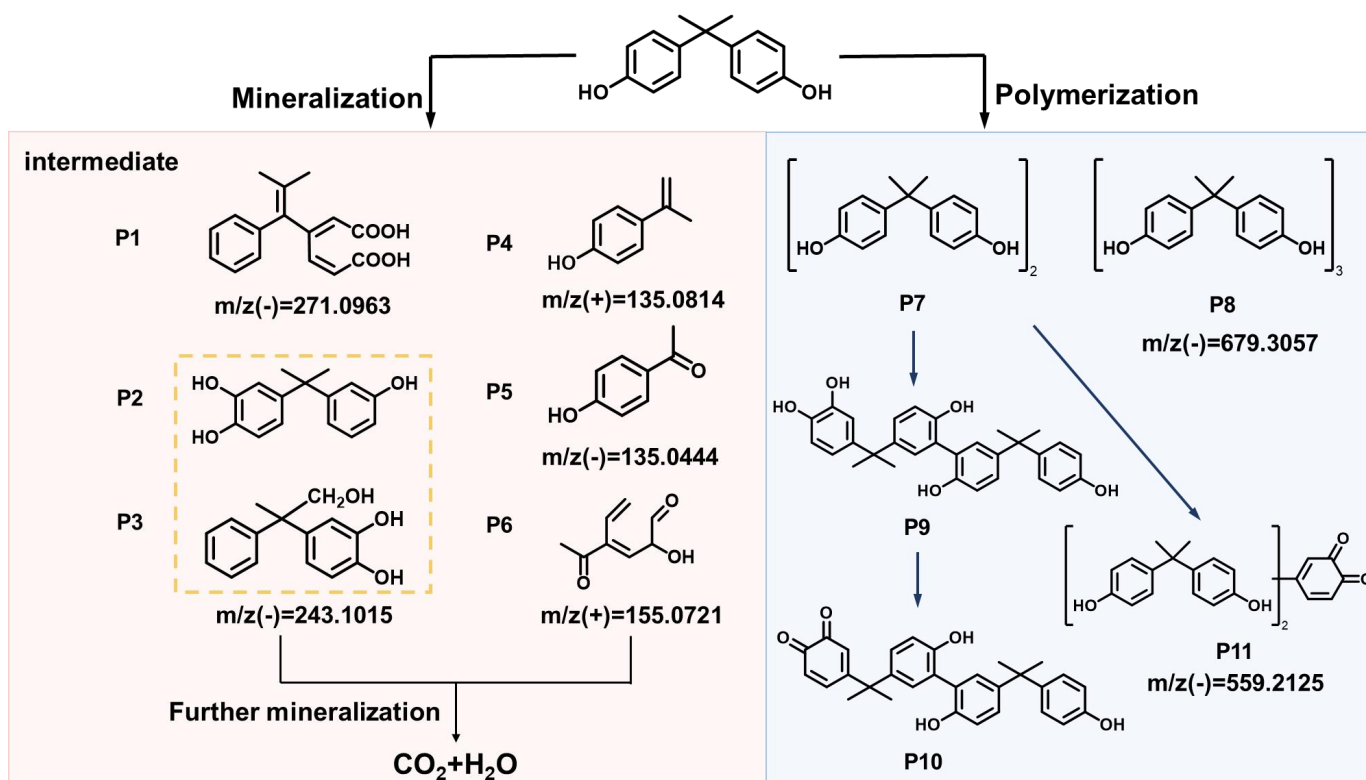

444 Figure S28. Photocatalytic degradation pathway of BPA.

445

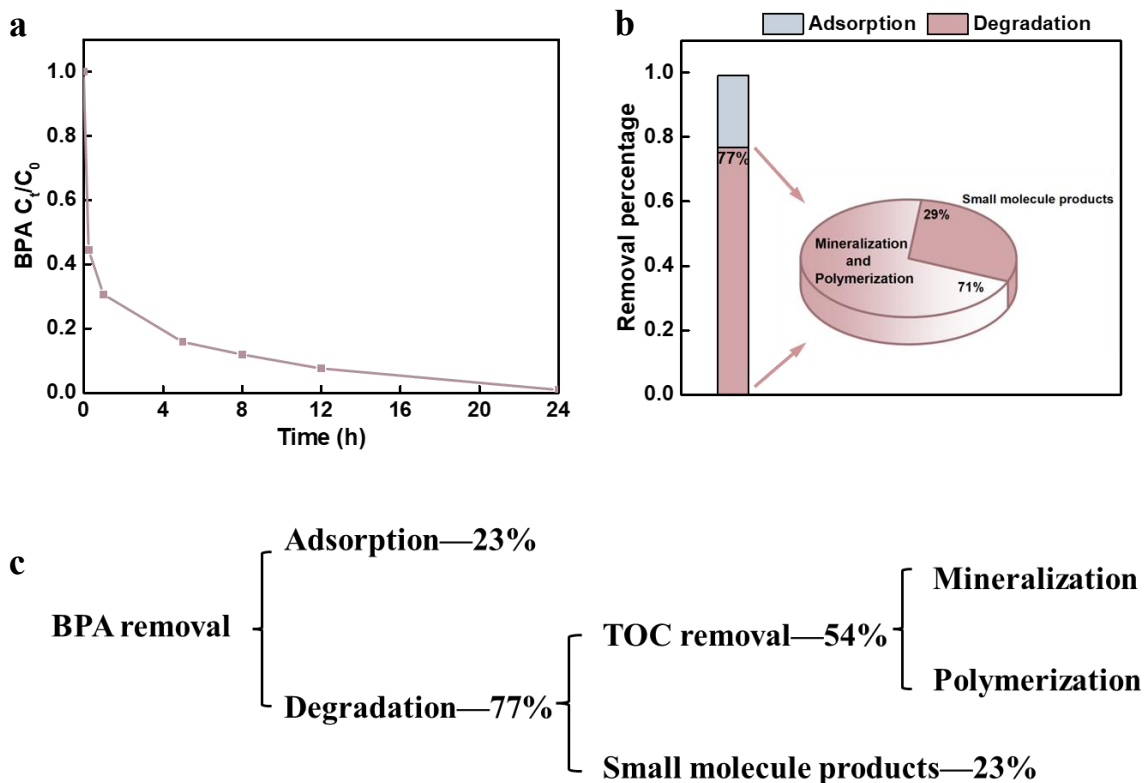

446 **Figure S29. TOC removal in the TPE-AQ system.** The temporal concentration changes of BPA  
 447 as a function of reaction time **(a)** and BPA removal pathway and proportion of each pathway **(b-c)**.  
 448 Reaction conditions were: [BPA] = 100  $\mu\text{M}$ , [TPE-AQ] = 0.1  $\text{g L}^{-1}$ , [reaction time] = 24 h,  $I_0 = 2.0$   
 449  $\text{mW cm}^{-2}$ .  
 450

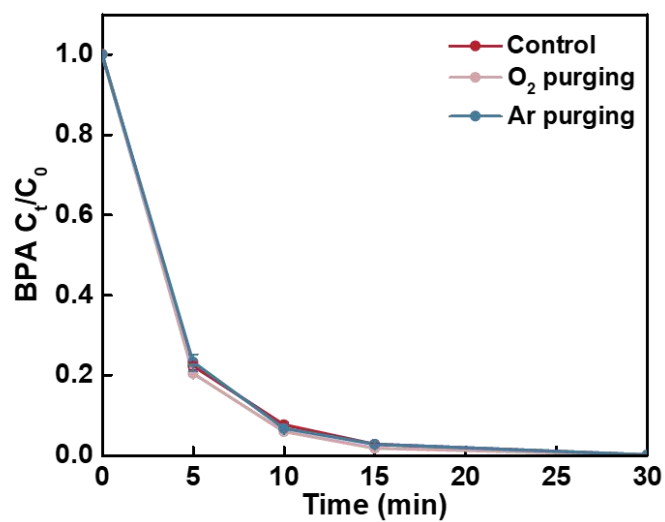

451

452 **Figure S30. Effect of atmospheric on the photocatalytic performance of TPE-AQ.**

453 Photocatalytic degradation of BPA by TPE-AQ with purging O<sub>2</sub> or Ar. Reaction conditions were:

454 [BPA] = 2 μM, [TPE-AQ] = 0.05 g L<sup>-1</sup>, [reaction time] = 30 min, I<sub>0</sub> = 2.0 mW cm<sup>-2</sup>. In the absence

455 of oxygen, the degradation of BPA was inhibited by 37%.

456

458 **Table S1. Photocatalytic activity and light intensity between TPE-AQ and other reported**  
459 **photocatalysts for micropollutants degradation.**

| Catalyst                            | Condition                                         | Adsorption time | Reaction time (min) | Light intensity (mW cm <sup>-2</sup> )                | Degradation rate/% | Ref              |
|-------------------------------------|---------------------------------------------------|-----------------|---------------------|-------------------------------------------------------|--------------------|------------------|
| Fc-TEB-CMP                          | 0.25 g L <sup>-1</sup> Cat, 0.10 mM (MB)          | 60 min          | 120                 | 100 ( $\lambda > 400$ nm)                             | 99                 | 2                |
| Cs <sub>2</sub> AgBiBr <sub>6</sub> | 2.0 g L <sup>-1</sup> Cat, 0.20 mM (RhB)          | 60 min          | 120                 | 110 ( $\lambda > 420$ nm)<br>33 ( $\lambda > 420$ nm) | 100<br>20          | 3                |
| LZS                                 | 0.2 g L <sup>-1</sup> Cat, 0.15 mM (4-CP)         | 30 min          | 10                  | 326<br>(320 < $\lambda$ < 780 nm)                     | 100                | 4                |
| TiO <sub>2</sub> -10                | 0.2 g L <sup>-1</sup> Cat, 0.40 mM (Phenol)       | 20 min          | 80                  | 100<br>(300 W xenon lamp)                             | 60                 | 5                |
| AMM                                 | 20 g L <sup>-1</sup> Cat, 0.02 mM (tetracycline)  | 30 min          | 120                 | 85 ( $\lambda > 400$ nm)                              | 92.6               | 6                |
| 2DZnTcpp                            | 0.2 g L <sup>-1</sup> Cat, 0.03 mM (MB)           | 12 h            | /                   | /                                                     | 31                 | 7                |
|                                     | 0.2 g L <sup>-1</sup> Cat, 0.03 mM (MB)           | /               | 60                  | 100 (xenon lamp)                                      | 46.2               |                  |
| WUCN-500                            | 0.2 g L <sup>-1</sup> Cat, 0.28 mM (OA)           | 30 min          | 30                  | 350 (320 < $\lambda$ < 800 nm)                        | 43                 | 8                |
| ACN0.5                              | 0.5 g L <sup>-1</sup> Cat, 0.01 mM (MB)           | 60 min          | 300                 | 38 ( $\lambda > 400$ nm)                              | 100                | 9                |
| 10CBBR-4                            | 0.1 g L <sup>-1</sup> Cat, 0.047 mM (Norfloxacin) | 60 min          | 120                 | 50 ( $\lambda > 400$ nm)                              | ~90                | 10               |
| COF-TD1                             | 0.3 g L <sup>-1</sup> Cat, 0.02 mM (BPA)          | 30 min          | 120                 | 125 ( $\lambda > 420$ nm)                             | >97%               | 11               |
| G_THS                               | 0.125 g L <sup>-1</sup> Cat, 0.02 mM (CIP)        | 60 min          | 360                 | 135 (AM 1.5G)                                         | 82                 | 12               |
| g-C <sub>3</sub> N <sub>4</sub>     | 0.5 g L <sup>-1</sup> Cat, 0.09 mM (BPA)          | 30 min          | 60                  | 180<br>(300 W xenon lamp)                             | ~35                | 13               |
| TPE-AQ                              | 0.05 g L <sup>-1</sup> Cat, 0.002 mM (BPA)        |                 | 60 min              | <b>2.0</b> ( $\lambda > 400$ nm)                      | 92                 | <b>This work</b> |

460 **Table S2. The HPLC conditions for analysis of different micropollutants.**

| <b>micropollutant</b>     | <b>Time<br/>(min)</b> | <b>Flow<br/>(mL/min)</b> | <b><math>\lambda</math><br/>(nm)</b> | <b>Methanol<br/>%</b> | <b>Acetonitrile<br/>%</b> | <b>Water<br/>%</b> | <b>0.1%<br/>Acetic<br/>acid water</b> | <b>0.1%<br/>Phosphoric<br/>water</b> |
|---------------------------|-----------------------|--------------------------|--------------------------------------|-----------------------|---------------------------|--------------------|---------------------------------------|--------------------------------------|
| Bisphenol A<br>(BPA)      | 7.1                   | 1.0                      | 226                                  | /                     | 50                        | /                  | 50                                    | /                                    |
| p-chlorophenol<br>(4-CP)  | 5.6                   | 1.0                      | 220                                  | /                     | 55                        | /                  | 45                                    | /                                    |
| Phenol                    | 8                     | 1.0                      | 270                                  | 55                    | /                         | /                  | 45                                    | /                                    |
| Triclosan<br>(TCS)        | 15.5                  | 1.0                      | 281                                  | /                     | 70                        | /                  | 30                                    | /                                    |
| Aniline                   | 4.25                  | 1.0                      | 232                                  | /                     | 45                        | 55                 | /                                     | /                                    |
| Sulfamethoxazole<br>(SMX) | 3.2                   | 1.0                      | 271                                  | 50                    | /                         | /                  | 50                                    | /                                    |
| carbamazepine<br>(CBZ)    | 4.0                   | 1.0                      | 286                                  | /                     | 60                        | /                  | 40                                    | /                                    |
|                           | 0                     |                          |                                      |                       | 30                        |                    |                                       | 70                                   |
|                           | 5.5                   |                          |                                      |                       | 30                        |                    |                                       | 70                                   |
| MC-LR                     | 6.5                   | 1.0                      | 238                                  | /                     | 90                        | /                  | /                                     | 10                                   |
|                           | 10                    |                          |                                      |                       | 90                        |                    |                                       | 10                                   |
|                           | 10.5                  |                          |                                      |                       | 30                        |                    |                                       | 70                                   |
|                           | 17.5                  |                          |                                      |                       | 30                        |                    |                                       | 70                                   |

**Table S3. Atomic coordinates of the TPE-AQ optimized computational model.**

| Atom | x         | y         | z         |
|------|-----------|-----------|-----------|
| C    | -4.138085 | 0.601535  | -0.077462 |
| C    | -3.333421 | -0.498083 | 0.000073  |
| C    | -5.625508 | 0.509824  | -0.028682 |
| C    | -3.861124 | -1.888101 | -0.123041 |
| C    | -1.861881 | -0.400676 | 0.208572  |
| C    | -3.593924 | 1.982223  | -0.223783 |
| C    | -4.072981 | 3.026430  | 0.585675  |
| C    | -3.572731 | 4.321009  | 0.450637  |
| C    | -2.599668 | 4.600887  | -0.512701 |
| C    | -2.133022 | 3.576300  | -1.340698 |
| C    | -2.625890 | 2.280165  | -1.197659 |
| C    | -3.488452 | -2.876801 | 0.803135  |
| C    | -3.970110 | -4.180444 | 0.687803  |
| C    | -4.816625 | -4.525079 | -0.369392 |
| C    | -5.176181 | -3.556111 | -1.310080 |
| C    | -4.702562 | -2.250650 | -1.188028 |
| C    | -6.412701 | 1.209533  | -0.959172 |
| C    | -7.804580 | 1.136178  | -0.915223 |
| C    | -8.436901 | 0.379650  | 0.075140  |
| C    | -7.665842 | -0.301209 | 1.021204  |
| C    | -6.274322 | -0.236544 | 0.969496  |
| C    | -1.317217 | 0.415927  | 1.214172  |
| C    | 0.056300  | 0.484117  | 1.416924  |
| C    | 0.943222  | -0.260093 | 0.618689  |
| C    | 0.398261  | -1.087273 | -0.379241 |
| C    | -0.976856 | -1.165407 | -0.570324 |
| C    | 2.407213  | -0.179505 | 0.825503  |
| C    | 2.954184  | -0.024271 | 2.115486  |
| C    | 4.327686  | 0.057724  | 2.306278  |
| C    | 5.203658  | -0.015522 | 1.217033  |
| C    | 4.672673  | -0.173188 | -0.079064 |
| C    | 3.291579  | -0.251406 | -0.261433 |
| C    | 6.668751  | 0.073247  | 1.448227  |
| C    | 7.559990  | -0.002870 | 0.255818  |



---

|   |           |           |           |
|---|-----------|-----------|-----------|
| C | 7.032009  | -0.156101 | -1.042871 |
| C | 5.563083  | -0.246210 | -1.273019 |
| O | 5.101530  | -0.376331 | -2.405173 |
| O | 7.130470  | 0.205342  | 2.581207  |
| H | -4.835105 | 2.813699  | 1.329242  |
| H | -3.944160 | 5.112095  | 1.095482  |
| H | -2.214164 | 5.610134  | -0.622420 |
| H | -1.387846 | 3.787698  | -2.102057 |
| H | -2.262283 | 1.485501  | -1.840783 |
| H | -2.823913 | -2.613891 | 1.620712  |
| H | -3.682714 | -4.927879 | 1.421525  |
| H | -5.187206 | -5.541498 | -0.463192 |
| H | -5.822542 | -3.818388 | -2.142608 |
| H | -4.984189 | -1.498505 | -1.917707 |
| H | -5.924674 | 1.805884  | -1.724171 |
| H | -8.395784 | 1.671976  | -1.652128 |
| H | -9.520876 | 0.327411  | 0.113905  |
| H | -8.148793 | -0.879625 | 1.803423  |
| H | -5.677423 | -0.766841 | 1.704094  |
| H | -1.982373 | 1.008908  | 1.832541  |
| H | 0.445712  | 1.140696  | 2.188651  |
| H | 1.054787  | -1.696683 | -0.992308 |
| H | -1.375878 | -1.825202 | -1.334247 |
| H | 2.294863  | 0.009289  | 2.976492  |
| H | 4.744217  | 0.170089  | 3.301096  |
| H | 2.916615  | -0.347244 | -1.274058 |
| C | 8.945388  | 0.079289  | 0.434412  |
| C | 9.800492  | 0.010156  | -0.663263 |
| C | 9.276516  | -0.142359 | -1.952071 |
| C | 7.898664  | -0.224899 | -2.139674 |
| H | 9.332344  | 0.196954  | 1.440426  |
| H | 10.874080 | 0.074462  | -0.517647 |
| H | 9.943219  | -0.196481 | -2.806743 |
| H | 7.473592  | -0.342989 | -3.130186 |

---

**Table S4. Atomic coordinates of the TPE-FN optimized computational model.**

| Atom | x         | y         | z         |
|------|-----------|-----------|-----------|
| C    | -3.794548 | -0.552838 | 0.027218  |
| C    | -2.917011 | 0.492687  | 0.031637  |
| C    | -5.258123 | -0.370724 | -0.192107 |
| C    | -3.359823 | 1.915855  | 0.084490  |
| C    | -1.441381 | 0.292828  | -0.011876 |
| C    | -3.358589 | -1.962441 | 0.245611  |
| C    | -3.808091 | -2.988047 | -0.603494 |
| C    | -3.410595 | -4.309104 | -0.399887 |
| C    | -2.573899 | -4.633640 | 0.671449  |
| C    | -2.139894 | -3.626554 | 1.537794  |
| C    | -2.528844 | -2.304664 | 1.326825  |
| C    | -4.307297 | 2.347056  | 1.028333  |
| C    | -4.699418 | 3.683496  | 1.086703  |
| C    | -4.151009 | 4.616736  | 0.202550  |
| C    | -3.198242 | 4.203797  | -0.732535 |
| C    | -2.799129 | 2.868537  | -0.783261 |
| C    | -6.188595 | -1.008156 | 0.646353  |
| C    | -7.559078 | -0.850101 | 0.442976  |
| C    | -8.026155 | -0.068718 | -0.617219 |
| C    | -7.111215 | 0.551734  | -1.472408 |
| C    | -5.741365 | 0.401870  | -1.261850 |
| C    | -0.848478 | -0.566301 | -0.952226 |
| C    | 0.530344  | -0.738190 | -0.998115 |
| C    | 1.376039  | -0.058082 | -0.103511 |
| C    | 0.783763  | 0.815418  | 0.825836  |
| C    | -0.595113 | 0.995548  | 0.862180  |
| C    | 2.845330  | -0.248023 | -0.143420 |
| C    | 3.402699  | -1.507831 | -0.435360 |
| C    | 4.786651  | -1.721495 | -0.484103 |
| C    | 5.634154  | -0.650817 | -0.230251 |
| C    | 5.085958  | 0.613531  | 0.065784  |
| C    | 3.720614  | 0.829817  | 0.111692  |
| C    | 7.110317  | -0.542916 | -0.203989 |
| C    | 7.455558  | 0.790326  | 0.103554  |

---

|   |           |           |           |
|---|-----------|-----------|-----------|
| C | 6.202786  | 1.585280  | 0.286431  |
| C | 8.106171  | -1.486973 | -0.421527 |
| C | 9.445938  | -1.076318 | -0.326139 |
| C | 9.782561  | 0.246619  | -0.021044 |
| C | 8.777486  | 1.199272  | 0.198148  |
| O | 6.108539  | 2.773887  | 0.558334  |
| H | -4.465676 | -2.740438 | -1.431324 |
| H | -3.756244 | -5.085859 | -1.075779 |
| H | -2.269025 | -5.663125 | 0.834108  |
| H | -1.501314 | -3.871395 | 2.381579  |
| H | -2.189141 | -1.523591 | 1.999096  |
| H | -4.735467 | 1.624055  | 1.714853  |
| H | -5.429917 | 3.997908  | 1.826456  |
| H | -4.457877 | 5.657456  | 0.246900  |
| H | -2.763482 | 4.922377  | -1.421222 |
| H | -2.052104 | 2.553322  | -1.505621 |
| H | -5.829406 | -1.622764 | 1.466256  |
| H | -8.262597 | -1.339160 | 1.110475  |
| H | -9.093266 | 0.049673  | -0.780008 |
| H | -7.464826 | 1.149299  | -2.307618 |
| H | -5.032593 | 0.886011  | -1.925576 |
| H | -1.480952 | -1.097018 | -1.655856 |
| H | 0.959318  | -1.385663 | -1.756591 |
| H | 1.406974  | 1.341082  | 1.542785  |
| H | -1.028814 | 1.674849  | 1.589504  |
| H | 2.738433  | -2.348762 | -0.607672 |
| H | 5.176727  | -2.709616 | -0.707284 |
| H | 3.336677  | 1.823702  | 0.319459  |
| H | 7.862778  | -2.517805 | -0.659349 |
| H | 10.236150 | -1.802067 | -0.493053 |
| H | 10.826830 | 0.534462  | 0.045569  |
| H | 9.017629  | 2.231132  | 0.435780  |

---

466

467

| <b>Catalyst</b> | <b>D (Å)</b> | <b>S<sub>m</sub></b> | <b>S<sub>r</sub></b> | <b>H (Å)</b> | <b>t (Å)</b> | <b>E (eV)</b> | <b>HDI</b> | <b>EDI</b> |
|-----------------|--------------|----------------------|----------------------|--------------|--------------|---------------|------------|------------|
| TPE-AQ          | 8.555        | 0.10165              | 0.30385              | 3.393        | 5.852        | 2.466         | 5.38       | 8.20       |
| TPE-FN          | 5.105        | 0.29071              | 0.53185              | 3.969        | 1.617        | 2.753         | 4.55       | 8.78       |

468 **Table S5. Time-dependent density functional theory (TD-DFT) of TPE-AQ and TPE-FN.**

469

470 **Table S6. Water quality parameters of the actual water.**

| 471<br>Water sources | pH   | TOC<br>(mgC/L) | TN<br>(mg/L) | Dissolved oxygen<br>(mg/L) | Cl <sup>-</sup><br>(mg/L) | SO <sub>4</sub> <sup>2-</sup><br>(mg/L) | NO <sub>3</sub> <sup>-</sup><br>(mg/L) |
|----------------------|------|----------------|--------------|----------------------------|---------------------------|-----------------------------------------|----------------------------------------|
| Beijiang River       | 7.49 | 1.72           | 2.04         | 10.82                      | 6.36                      | 18.29                                   | 1.81                                   |
| Xiaogu River         | 7.60 | 3.30           | 3.52         | 10.40                      | 29.50                     | 22.13                                   | 1.34                                   |
| Sea Water            | 8.39 | 2.24           | 0.61         | 9.87                       | 19430.76                  | 2178.94                                 | 7.52                                   |

472 **Table S7. Summary of the half-life and redox potential of common transient active species**  
 473 **and OCORs.**

| radical                                     | Potential (V) vs NHE                                                                                                                                              | half-life                                          | Ref              |
|---------------------------------------------|-------------------------------------------------------------------------------------------------------------------------------------------------------------------|----------------------------------------------------|------------------|
| $\cdot\text{OH}$                            | 1.80-2.70                                                                                                                                                         | $10^{-10}$ s                                       | 14, 15           |
| $\text{SO}_4^{\cdot-}$                      | 2.50-3.10                                                                                                                                                         | $3.0\text{-}4.0 \times 10^{-5}$ s                  | 14, 16           |
| $\text{O}_2^{\cdot-}$                       | -0.33 ( $\text{O}_2 + \text{e}^- \rightarrow \text{O}_2^{\cdot-}$ )<br>0.91 ( $\text{O}_2^{\cdot-} + \text{e}^- + 2\text{H}^+ \rightarrow \text{H}_2\text{O}_2$ ) | $10^{-6}$ s                                        | 15, 17, 18       |
| $^1\text{O}_2$                              | 0.81 ( $^1\text{O}_2 + \text{e}^- \rightarrow \text{O}_2^{\cdot-}$ )                                                                                              | $10^{-6}$ s (in water)<br>$10^{-2}$ s (in the air) | 15, 17, 19       |
| oxygen-centered organic radicals<br>(OCORs) | 1.50 <sup>a</sup>                                                                                                                                                 | 7 min                                              | <b>This work</b> |

474 a: represented by the half-wave potential.

475

476 **Table S8. Single-point energy of each substance.**

| Substance          | Optimized structure                                                                 | Single-point energy (a.u.) |
|--------------------|-------------------------------------------------------------------------------------|----------------------------|
| OCORs              | 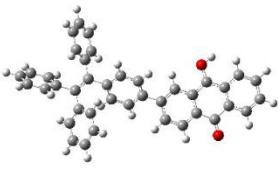   | -1689.1633                 |
| anthrahydroquinone |    | -1689.7609                 |
| H <sub>2</sub> O   |    | -76.3825                   |
| BPA                |  | -730.8941                  |
| BPA <sup>++</sup>  |  | -730.6780                  |
| BPA <sup>·</sup>   |  | -730.2672                  |
| ·OH                |  | -75.6999                   |
| OH <sup>-</sup>    |  | -75.8819                   |

477 The structural formula of OCORs and anthrahydroquinone in the computational  
478 model:

OCORs

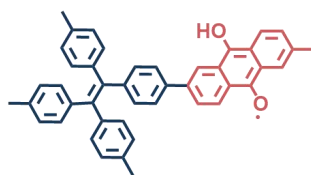

anthrahydroquinone

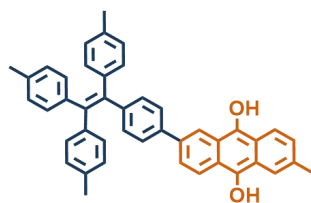

479

480



**Table S9. Identification of transformation products of BPA in the TPE-AQ system.**

| Code | RT<br>(min) | Formula                                        | m/z [M-H] <sup>-</sup> | m/z [M+H] <sup>+</sup> | Δ (ppm) | System                       |
|------|-------------|------------------------------------------------|------------------------|------------------------|---------|------------------------------|
| P1   | 5.985       | C <sub>16</sub> H <sub>16</sub> O <sub>4</sub> | 271.0963               | /                      | -2.6    | Reaction<br>(water)          |
| P2   | 5.240       | C <sub>15</sub> H <sub>16</sub> O <sub>3</sub> | 243.1015               | /                      | -2.5    | Desorption<br>(acetonitrile) |
| P3   |             |                                                |                        |                        |         |                              |
| P4   | 3.237       | C <sub>9</sub> H <sub>10</sub> O               | /                      | 135.0814               | 3.0     | Reaction<br>(water)          |
| P5   | 3.466       | C <sub>8</sub> H <sub>8</sub> O <sub>2</sub>   | 135.0444               | /                      | -1.5    | Reaction<br>(water)          |
| P6   | 4.324       | C <sub>8</sub> H <sub>10</sub> O <sub>3</sub>  | /                      | 155.0721               | 8.4     | Desorption<br>(acetonitrile) |
|      | 6.915       |                                                | 453.2071               | /                      | 1.1     |                              |
| P7   | 7.070       | C <sub>30</sub> H <sub>30</sub> O <sub>4</sub> | 453.2084               | /                      | 4.0     |                              |
|      | 7.646       |                                                | 453.2079               | /                      | 2.9     |                              |
| P8   | 8.046       | C <sub>45</sub> H <sub>44</sub> O <sub>6</sub> | 679.3067               | /                      | 1.0     |                              |
|      | 6.671       |                                                | 469.2016               | /                      | 0.2     | Desorption<br>(acetonitrile) |
| P9   | 6.878       | C <sub>30</sub> H <sub>30</sub> O <sub>5</sub> | 469.2026               | /                      | 2.3     |                              |
|      | 6.929       |                                                | 469.2028               | /                      | 2.8     |                              |
|      | 7.080       |                                                | 469.2031               | /                      | 3.4     |                              |
| P10  | 7.267       | C <sub>30</sub> H <sub>28</sub> O <sub>5</sub> | 467.1861               | /                      | 0.6     |                              |
|      | 8.015       |                                                | 467.1857               | /                      | -0.2    |                              |
| P11  | 8.357       | C <sub>36</sub> H <sub>32</sub> O <sub>6</sub> | 559.2125               | /                      | 0.7     |                              |

**Table S10. Baseline toxicity data predicted using the ECOSAR program of EPI Suite 4.0.**

| Code | Formula                                        | Organism    | Duration (h) | End Pt | Concentration<br>(mg L <sup>-1</sup> ) |
|------|------------------------------------------------|-------------|--------------|--------|----------------------------------------|
| BPA  | C <sub>15</sub> H <sub>16</sub> O <sub>2</sub> | Fish        | 96           | LC50   | 6.274                                  |
|      |                                                | Daphnid     | 48           | LC50   | 4.146                                  |
|      |                                                | Green Algae | 96           | EC50   | 5.782                                  |
| P1   | C <sub>16</sub> H <sub>16</sub> O <sub>4</sub> | Fish        | 96           | LC50   | 117.768                                |
|      |                                                | Daphnid     | 48           | LC50   | 76.264                                 |
|      |                                                | Green Algae | 96           | EC50   | 97.829                                 |
| P2   | C <sub>15</sub> H <sub>16</sub> O <sub>3</sub> | Fish        | 96           | LC50   | 18.122                                 |
|      |                                                | Daphnid     | 48           | LC50   | 11.456                                 |
|      |                                                | Green Algae | 96           | EC50   | 13.302                                 |
| P3   | C <sub>15</sub> H <sub>16</sub> O <sub>3</sub> | Fish        | 96           | LC50   | 138.825                                |
|      |                                                | Daphnid     | 48           | LC50   | 80.134                                 |
|      |                                                | Green Algae | 96           | EC50   | 63.894                                 |
| P4   | C <sub>9</sub> H <sub>10</sub> O               | Fish        | 96           | LC50   | 15.074                                 |
|      |                                                | Daphnid     | 48           | LC50   | 9.354                                  |
|      |                                                | Green Algae | 96           | EC50   | 10.061                                 |
| P5   | C <sub>8</sub> H <sub>8</sub> O <sub>2</sub>   | Fish        | 96           | LC50   | 592.967                                |
|      |                                                | Daphnid     | 48           | LC50   | 312.526                                |
|      |                                                | Green Algae | 96           | EC50   | 171.100                                |
| P6   | C <sub>8</sub> H <sub>10</sub> O <sub>3</sub>  | Fish        | 96           | LC50   | 4.26×10 <sup>4</sup>                   |
|      |                                                | Daphnid     | 48           | LC50   | 1.87×10 <sup>4</sup>                   |
|      |                                                | Green Algae | 96           | EC50   | 4749.775                               |
| P7   | C <sub>30</sub> H <sub>30</sub> O <sub>4</sub> | Fish        | 96           | LC50   | 0.011                                  |
|      |                                                | Daphnid     | 48           | LC50   | 0.010                                  |
|      |                                                | Green Algae | 96           | EC50   | 0.050                                  |
| P8   | C <sub>45</sub> H <sub>44</sub> O <sub>6</sub> | Fish        | 96           | LC50   | 1.38×10 <sup>-5</sup>                  |
|      |                                                | Daphnid     | 48           | LC50   | 1.71×10 <sup>-5</sup>                  |
|      |                                                | Green Algae | 96           | EC50   | 3.24×10 <sup>-4</sup>                  |
| P9   | C <sub>30</sub> H <sub>30</sub> O <sub>5</sub> | Fish        | 96           | LC50   | 0.030                                  |
|      |                                                | Daphnid     | 48           | LC50   | 0.026                                  |
|      |                                                | Green Algae | 96           | EC50   | 0.111                                  |

|     |                                                |             |    |      |       |
|-----|------------------------------------------------|-------------|----|------|-------|
|     |                                                | Fish        | 96 | LC50 | 0.022 |
| P10 | C <sub>30</sub> H <sub>28</sub> O <sub>5</sub> | Daphnid     | 48 | LC50 | 0.019 |
|     |                                                | Green Algae | 96 | EC50 | 0.088 |
|     |                                                | Fish        | 96 | LC50 | 0.005 |
| P11 | C <sub>36</sub> H <sub>32</sub> O <sub>6</sub> | Daphnid     | 48 | LC50 | 0.005 |
|     |                                                | Green Algae | 96 | EC50 | 0.031 |

484

485

486 **Supplemental References**

- 487 1. Z. Lan, M. Wu, Z. Fang, X. Chi, X. Chen, Y. Zhang and X. Wang, A fully coplanar  
488 donor–acceptor polymeric semiconductor with promoted charge separation kinetics for  
489 photochemistry, *Angew. Chem. Int. Ed.*, 2021, **60**, 16355-16359.
- 490 2. L. Ma, Y. Liu, Y. Liu, S. Jiang, P. Li, Y. Hao, P. Shao, A. Yin, X. Feng and B. Wang,  
491 Ferrocene-linkage-facilitated charge separation in conjugated microporous polymers,  
492 *Angewandte Chemie International Edition*, 2019, **58**, 4221-4226.
- 493 3. Z. Zhang, Y. Liang, H. Huang, X. Liu, Q. Li, L. Chen and D. Xu, Stable and highly efficient  
494 photocatalysis with lead-free double-perovskite of Cs<sub>2</sub>AgBiBr<sub>6</sub>, *Angewandte Chemie  
495 International Edition*, 2019, **58**, 7263-7267.
- 496 4. L. Wang, D. W. Bahnemann, L. Bian, G. Dong, J. Zhao and C. Wang, Two-dimensional  
497 layered zinc silicate nanosheets with excellent photocatalytic performance for organic  
498 pollutant degradation and CO<sub>2</sub> conversion, *Angewandte Chemie International Edition*, 2019,  
499 **58**, 8103-8108.
- 500 5. L. Pan, M. Ai, C. Huang, L. Yin, X. Liu, R. Zhang, S. Wang, Z. Jiang, X. Zhang, J.-J. Zou  
501 and W. Mi, Manipulating spin polarization of titanium dioxide for efficient photocatalysis,  
502 *Nature Communications*, 2020, **11**, 418.
- 503 6. S. Fang, X. Lyu, T. Tong, A. I. Lim, T. Li, J. Bao and Y. H. Hu, Turning dead leaves into an  
504 active multifunctional material as evaporator, photocatalyst, and bioplastic, *Nature  
505 Communications*, 2023, **14**, 1203.
- 506 7. Z. Zhu, Y. Liu, C. Song, Y. Hu, G. Feng and B. Tang, Porphyrin-based two-dimensional  
507 layered metal-organic framework with sono-/photocatalytic activity for water  
508 decontamination, *ACS Nano*, 2022, **16**, 1346-1357.
- 509 8. Y. Wang, X. Li, S. Liu, Y. Liu, T. Kong, H. Zhang, X. Duan, C. Chen and S. Wang, Roles of  
510 catalyst structure and gas surface reaction in the generation of hydroxyl radicals for  
511 photocatalytic oxidation, *ACS Catalysis*, 2022, **12**, 2770-2780.
- 512 9. X. Bai, R. Zong, C. Li, D. Liu, Y. Liu and Y. Zhu, Enhancement of visible photocatalytic  
513 activity via Ag@C<sub>3</sub>N<sub>4</sub> core–shell plasmonic composite, *Applied Catalysis B: Environmental*,  
514 2014, **147**, 82-91.

- 515 10. Y. Zhang, Y. Li and Y. Yuan, Carbon quantum dot-decorated BiOBr/Bi<sub>2</sub>WO<sub>6</sub> photocatalytic  
516 micromotor for environmental remediation and DFT calculation, *ACS Catalysis*, 2022, **12**,  
517 13897-13909.
- 518 11. Y. Hou, F. Liu, B. Zhang and M. Tong, Thiadiazole-based covalent organic frameworks with  
519 a donor-acceptor structure: modulating intermolecular charge transfer for efficient  
520 photocatalytic degradation of typical emerging contaminants, *Environmental Science &*  
521 *Technology*, 2022, **56**, 16303-16314.
- 522 12. L. Liccardo, M. Bordin, P. M. Sheverdyaeva, M. Belli, P. Moras, A. Vomiero and E. Moretti,  
523 Surface defect engineering in colored TiO<sub>2</sub> hollow spheres toward efficient photocatalysis,  
524 *Advanced Functional Materials*, 2023, **33**, 2212486.
- 525 13. S. Zhang, H. Lan, Y. Cui, X. An, H. Liu and J. Qu, Insight into the key role of Cr  
526 intermediates in the efficient and simultaneous degradation of organic contaminants and  
527 Cr(VI) reduction via g-C<sub>3</sub>N<sub>4</sub>-assisted photocatalysis, *Environmental Science & Technology*,  
528 2022, **56**, 3552-3563.
- 529 14. Z. Zhao, P. Wang, C. Song, T. Zhang, S. Zhan and Y. Li, Enhanced interfacial electron  
530 transfer by asymmetric Cu-O<sub>v</sub>-in sites on In<sub>2</sub>O<sub>3</sub> for efficient peroxymonosulfate activation,  
531 *Angewandte Chemie International Edition*, 2023, **62**, e202216403.
- 532 15. C. Zhao, J. Chen, R. Zhong, D. S. Chen, J. Shi and J. Song, Oxidative-species-selective  
533 materials for diagnostic and therapeutic applications, *Angewandte Chemie International*  
534 *Edition*, 2021, **60**, 9804-9827.
- 535 16. Y. Gao, Z. Chen, Y. Zhu, T. Li and C. Hu, New insights into the generation of singlet oxygen  
536 in the metal-free peroxymonosulfate activation process: important role of electron-deficient  
537 carbon atoms, *Environmental Science & Technology*, 2020, **54**, 1232-1241.
- 538 17. Y. Nosaka and A. Y. Nosaka, Generation and detection of reactive oxygen species in  
539 photocatalysis, *Chemical Reviews*, 2017, **117**, 11302-11336.
- 540 18. Y. Sheng, I. A. Abreu, D. E. Cabelli, M. J. Maroney, A.-F. Miller, M. Teixeira and J. S.  
541 Valentine, Superoxide dismutases and superoxide reductases, *Chemical Reviews*, 2014, **114**,  
542 3854-3918.
- 543 19. J. Lee, U. von Gunten and J. H. Kim, Persulfate-based advanced oxidation: critical  
544 assessment of opportunities and roadblocks, *Environmental Science & Technology*, 2020, **54**,

545 3064-3081.

546
